# Supplementary material for: One-pot generation of benzynes from 2-aminophenylboronates via a Rh(ii)-catalyzed N–H amination/oxidation/elimination cascade process
Source: Royal Society of Chemistry journal article supplement (doi:10.1039/c9qo01115c), 2019-11-18

## Supporting Information

### **One-pot Generation of Benzyne from 2-Aminophenylboronates via Rh(II)- Catalyzed N–H Amination/oxidation/elimination Cascade Process**

Motoki Ito,<sup>\*</sup> Arisa Tanaka, Keiju Hatakeyama, Emi Kano, Kazuhiro Higuchi, and Shigeo Sugiyama<sup>\*</sup>

*Meiji Pharmaceutical University, 2-522-1 Noshio Kiyose, Tokyo 204-8588, Japan*

## Experimental Section

**General.** All melting points were measured on a Yanagimoto micro melting point apparatus. IR spectra were recorded on a JASCO FT/IR-4100 spectrometer and absorbance bands are reported in wavenumber ( $\text{cm}^{-1}$ ).  $^1\text{H}$  NMR spectra were recorded on JEOL JNM-AL 300 (300 MHz) spectrometer or JEOL JNM-ECA 400 (400 MHz) spectrometer. Chemical shifts are reported relative to internal standard (tetramethylsilane at  $\delta_{\text{H}}$  0.00,  $\text{CDCl}_3$  at  $\delta_{\text{H}}$  7.26,  $\text{DMSO-}d_6$  at  $\delta_{\text{H}}$  2.50,  $\text{CD}_3\text{OD}$  at  $\delta_{\text{H}}$  3.49). Data are presented as follows: chemical shift ( $\delta$ , ppm), multiplicity (s = singlet, d = doublet, t = triplet, q = quartet, m = multiplet), coupling constant and integration.  $^{13}\text{C}$  NMR spectra were recorded on JEOL JNM-ECA 400 (100 MHz) spectrometer. Chemical shifts are reported relative to internal standard ( $\text{CDCl}_3$  at  $\delta$  77.00,  $\text{CD}_3\text{OD}$  at  $\delta$  49.86). Mass spectra were recorded on a JEOL JMS 700 instrument with a direct inlet system. Column chromatography was carried out on Kanto silica gel 60 N (40–50 mesh). Analytical thin layer chromatography (TLC) was carried out on Merck Kieselgel 60 F<sub>254</sub> plates with visualization by ultraviolet, anisaldehyde stain solution or phosphomolybdic acid stain solution. All non-aqueous reactions were carried out in flame-dried glassware under Ar atmosphere unless otherwise noted. Reagents and solvents were used without purification.  $4\text{\AA}$  MS (powder) from nacalai tesque was used after drying. Dirhodium(II) complex catalysts,  $\text{Rh}_2(\text{esp})_2$  and  $\text{Rh}_2(\text{HNCOCF}_3)_4$ , were prepared according to literatures,<sup>1,2</sup> while  $\text{Rh}_2(\text{esp})_2$  is commercially available.  $\text{TsN=IMes}$  was prepared according to a literature.<sup>3</sup> 2-Aminophenylboronates **1b**, **1c** and **1e** were synthesized according to the literature.<sup>4,5</sup> Azides **4a** and **4h** were prepared according to the literature.<sup>6,7</sup>

## 1. Procedure for the preparation of 3-(*tert*-butyldimethylsilyloxy)propyl 4-azidobenzoate (**4b**).

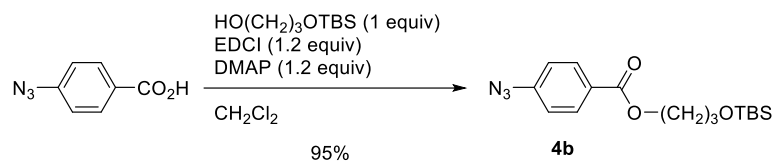

To a solution of 4-azidobenzoic acid (856 mg, 5.30 mmol), propylene glycol mono-TBS ether (1.00 g, 5.30 mmol) and DMAP (770 mg, 6.30 mmol) in  $\text{CH}_2\text{Cl}_2$  (53 mL) was added EDCI (1.21 g, 6.30 mmol) at 0 °C. After stirring at room temperature for 12 h, the reaction was quenched with 10 % aqueous HCl, and the mixture was extracted with EtOAc. The organic extract was successively washed with saturated aqueous  $\text{NaHCO}_3$  and brine, and dried over anhydrous  $\text{Na}_2\text{SO}_4$ . Filtration and evaporation in vacuo furnished the crude product, which was purified by column chromatography (silica gel, 10:1 *n*-hexane/EtOAc) to give 4-azidobenzoate **4b** (1.68 g, 95%) as a light yellow oil: IR (KBr)  $\nu$  2955, 2123, 1721, 1603, 1275, 1100  $\text{cm}^{-1}$ ;  $^1\text{H}$  NMR (400 MHz,  $\text{CDCl}_3$ ):  $\delta$  0.06 (s, 6H,  $\text{SiCH}_3$ ), 0.90 (s, 9H, *t*-Bu), 1.97 (quintet,  $J = 6.0$  Hz, 2H,  $\text{CH}_2\text{CH}_2\text{CH}_2$ ), 3.78 (t,  $J = 6.0$  Hz, 2H,  $\text{CH}_2\text{OTBS}$ ), 4.41 (t,  $J = 6.0$  Hz, 2H,  $\text{CO}_2\text{CH}_2$ ), 7.06 (d,  $J = 8.4$  Hz, 2H, ArH), 8.03 (d,  $J = 8.4$  Hz, 2H, ArH);  $^{13}\text{C}$  NMR (100 MHz,  $\text{CDCl}_3$ ):  $\delta$  -5.5 ( $\text{CH}_3$ ), 18.3 (C), 25.8 ( $\text{CH}_3$ ), 31.8 ( $\text{CH}_2$ ), 59.4 ( $\text{CH}_2$ ), 62.0 ( $\text{CH}_2$ ), 118.8 (CH), 126.9 (C), 131.3 (CH), 144.6 (C), 165.7 (C=O); HRMS (FAB) calcd for  $\text{C}_{16}\text{H}_{25}\text{N}_3\text{O}_3\text{Si}$   $[\text{M}+\text{H}]^+$  336.1743, found 336.1745.

## 2. Procedure for the preparation of 3-(*p*-methoxybenzyloxy)propyl 4-azidobenzoate (**4c**).

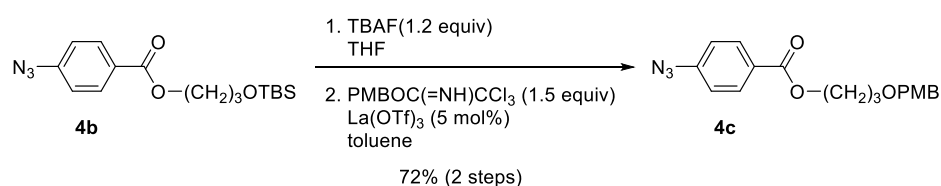

To a solution of **4b** (503 mg, 1.50 mmol) in THF (4.0 mL) was added TBAF (1 M in THF, 2.00 mL, 2.00 mmol) at 0 °C. After stirring at room temperature for 1 h, water was added to the reaction mixture, and the mixture was extracted with EtOAc. The organic extract was successively washed with brine, and dried over anhydrous  $\text{Na}_2\text{SO}_4$ . Filtration and evaporation in vacuo furnished the crude product, which was purified by column chromatography (silica gel, 1:1 *n*-hexane/EtOAc) to give corresponding alcohol (301 mg, 91%) as a colorless oil: IR (KBr)  $\nu$  3410, 2960, 2124, 1716, 1603, 1278  $\text{cm}^{-1}$ ;  $^1\text{H}$  NMR (400 MHz,  $\text{CDCl}_3$ ):  $\delta$  2.01 (quintet,  $J = 6.0$  Hz, 2H,  $\text{CH}_2\text{CH}_2\text{CH}_2$ ), 2.13 (brs, 1H, OH), 3.77 (t,  $J = 6.0$  Hz, 2H,  $\text{CH}_2\text{OH}$ ), 4.48 (t,  $J = 6.0$  Hz, 2H,  $\text{CO}_2\text{CH}_2$ ), 7.07 (dd,  $J = 2.0, 8.8$  Hz, 2H, ArH),

8.03 (dd,  $J = 2.0, 8.8$  Hz, 2H, ArH);  $^{13}\text{C}$  NMR (100 MHz,  $\text{CDCl}_3$ ):  $\delta$  31.8 ( $\text{CH}_2$ ), 59.1 ( $\text{CH}_2$ ), 61.8 ( $\text{CH}_2$ ), 118.8 (CH), 126.6 (C), 131.4 (CH), 144.9 (C), 166.1 (C=O); HRMS (EI) calcd for  $\text{C}_{10}\text{H}_{11}\text{N}_3\text{O}_3$   $[\text{M}]^+$  221.0800, found 221.0801.

To a solution of **4b** (301 mg, 1.36 mmol) and PMBOC(=NH)CCl<sub>3</sub> (424  $\mu\text{L}$ , 2.04 mmol) in toluene (20 mL) was added La(OTf)<sub>3</sub> (39.9 mg, 0.0680 mmol) at room temperature.<sup>8</sup> After stirring at room temperature for 30 min, the whole mixture was evaporated in vacuo to furnish the crude product, which was purified by column chromatography (silica gel, 4:1 *n*-hexane/EtOAc) to give PMB ether **4c** (368 mg, 79%) as a light yellow oil: IR (KBr)  $\nu$  2859, 2122, 1717, 1603, 1512, 1275, 1100  $\text{cm}^{-1}$ ;  $^1\text{H}$  NMR (400 MHz,  $\text{CDCl}_3$ ):  $\delta$  2.05 (quintet,  $J = 6.0$  Hz, 2H,  $\text{CH}_2\text{CH}_2\text{CH}_2$ ), 3.59 (t,  $J = 6.0$  Hz, 2H,  $\text{CH}_2\text{OPMB}$ ), 3.77 (s, 3H,  $\text{OCH}_3$ ), 4.42 (t,  $J = 6.0$  Hz, 2H,  $\text{CO}_2\text{CH}_2$ ), 4.45 (s, 2H,  $\text{OCH}_2\text{Ar}$ ), 6.85 (d,  $J = 8.8$  Hz, 2H, ArH), 7.03 (d,  $J = 8.8$  Hz, 2H, ArH), 7.25 (d,  $J = 8.8$  Hz, 2H, ArH), 7.97 (d,  $J = 8.8$  Hz, 2H, ArH);  $^{13}\text{C}$  NMR (100 MHz,  $\text{CDCl}_3$ ):  $\delta$  29.1 ( $\text{CH}_2$ ), 55.1 ( $\text{CH}_3$ ), 62.2 ( $\text{CH}_2$ ), 66.1 ( $\text{CH}_2$ ), 72.6 ( $\text{CH}_2$ ), 113.7 (CH), 118.7 (CH), 126.8 (C), 129.2 (CH), 130.3 (C), 131.3 (CH), 144.5 (C), 159.1 (C), 165.6 (C=O); HRMS (EI) calcd for  $\text{C}_{18}\text{H}_{19}\text{N}_3\text{O}_4$   $[\text{M}]^+$  341.1376, found 341.1374.

### 3. Procedure for the preparation of 2-amino-5-(2-methoxy-2-oxo-1-phenylethyl)phenylboronic acid pinacol ester (**1f**).

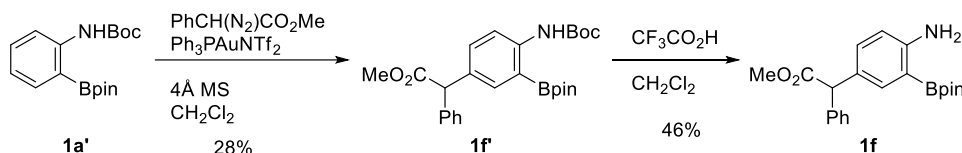

A solution of methyl phenyldiazoacetate [0.25 M in  $\text{CH}_2\text{Cl}_2$ , 12.0 mL, pre-dried over 4Å MS (pellets)] was slowly added to a mixture of *N*-Boc-2-aminophenylboronic acid pinacol ester (**1a'**) (1.92 g, 6.00 mmol),  $\text{Ph}_3\text{PAuNTf}_2$  (235 mg, 0.150 mmol, 2.5 mol%), and 4Å MS (powder, 120 mg) in  $\text{CH}_2\text{Cl}_2$  (3.0 mL) at room temperature.<sup>9</sup> After stirring for 1 h at the same temperature, the whole mixture was filtered through a pad of Celite, and the filtrate was evaporated in vacuo to furnish the crude product, which was purified by column chromatography (silica gel, 8:1 *n*-hexane/AcOEt) to give C–H insertion product **1f'** (386 mg, 28%) as a colorless oil: IR (KBr)  $\nu$  3370, 2978, 1733, 1530, 1352, 1157  $\text{cm}^{-1}$ ;  $^1\text{H}$  NMR (400 MHz,  $\text{CDCl}_3$ ):  $\delta$  1.34 (s, 12H,  $\text{OC}(\text{CH}_3)_2$ ), 1.51 (s, 9H, *t*-Bu), 3.72 (s, 3H,  $\text{CO}_2\text{CH}_3$ ), 4.99 (s, 1H,  $\text{Ar}_2\text{CHCO}_2\text{Me}$ ), 7.23–7.30 (m, 5H, ArH), 7.42 (dd,  $J = 2.4, 8.8$  Hz, 1H, ArH), 7.66 (d,  $J = 2.4$  Hz, 1H, ArH), 8.15 (d,  $J = 8.8$  Hz, 1H, ArH), 8.68 (s, 1H, NH);  $^{13}\text{C}$  NMR (100 MHz,  $\text{CDCl}_3$ ):  $\delta$  24.8 ( $\text{CH}_3$ ), 28.3 ( $\text{CH}_3$ ), 52.2 ( $\text{CH}_3$ ), 56.3 (CH), 79.8 (C), 84.2 (C), 118.0 (CH), 127.0 (CH), 128.4 (CH), 128.5 (CH), 131.3 (C), 132.8 (CH), 136.3 (CH), 138.9 (C), 144.5

(C), 153.0 (C=O), 173.0 (C=O) (C-B was not detected.); HRMS (EI) calcd for  $C_{26}H_{34}BNO_6$   $[M]^+$  467.2479, found 467.2481.

*N*-Boc amine **1f'** (105 mg, 0.225 mmol) was dissolved in TFA-CH<sub>2</sub>Cl<sub>2</sub> (1:3, 2.0 mL) at 0 °C. After stirring for 5 h at the same temperature, the whole mixture was poured into saturated aqueous NaHCO<sub>3</sub>, and the mixture was extracted with CH<sub>2</sub>Cl<sub>2</sub>. The combined organic extracts were dried over anhydrous Na<sub>2</sub>SO<sub>4</sub>. Filtration and evaporation in vacuo furnished the crude product, which was purified by column chromatography (silica gel, 3:1 to 2:1 *n*-hexane/AcOEt) to give primary amine **1f** (38.2 mg, 46%) as a colorless oil: IR (KBr)  $\nu$  3286, 3386, 2978, 1736, 1619, 1495, 1432, 1358, 1143 cm<sup>-1</sup>; <sup>1</sup>H NMR (400 MHz, CDCl<sub>3</sub>):  $\delta$  1.32 (s, 12H, OC(CH<sub>3</sub>)<sub>2</sub>), 3.71 (s, 3H, OCH<sub>3</sub>), 4.74 (brs, 2H, NH<sub>2</sub>), 4.93 (s, 1H, Ar<sub>2</sub>CHCO<sub>2</sub>), 6.56 (d, *J* = 8.0 Hz, 1H, Ar*H*), 7.19–7.29 (m, 6H, Ar*H*), 7.53 (d, *J* = 1.6 Hz, 1H, Ar*H*); <sup>13</sup>C NMR (100 MHz, CDCl<sub>3</sub>):  $\delta$  24.8 (CH<sub>3</sub>), 24.9 (CH<sub>3</sub>), 52.1 (CH<sub>3</sub>), 56.1 (CH), 83.5 (C), 115.2 (CH), 126.5 (C), 126.9 (CH), 128.3 (CH), 128.4 (CH), 132.8 (CH), 137.0 (CH), 139.5 (C), 153.0 (C), 173.5 (C=O) (C-B was not detected.); HRMS (EI) calcd for  $C_{21}H_{26}BNO_4$   $[M]^+$  367.1955, found 367.1956.

#### 4. Procedure for the preparation of 2-amino-4-(methoxycarbonyl)phenylboronic acid pinacol ester (**1g**).<sup>10</sup>

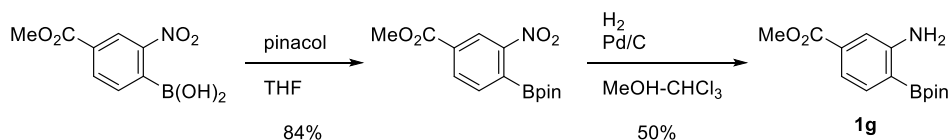

To a solution of 4-methoxycarbonyl-2-nitrophenylboronic acid (900 mg, 4.00 mmol) in THF (20 mL) was added pinacol (472 mg, 4.00 mmol) at room temperature. After stirring overnight at the same temperature, the whole mixture was evaporated in vacuo to furnish the crude product, which was purified by column chromatography (silica gel, 4:1 *n*-hexane/AcOEt) to give corresponding pinacol ester (1.03 g, 84%) as a colorless solid: <sup>1</sup>H NMR (300 MHz, CDCl<sub>3</sub>):  $\delta$  1.44 (s, 12H, OC(CH<sub>3</sub>)<sub>2</sub>), 3.99 (s, 3H, CO<sub>2</sub>CH<sub>3</sub>), 6.65 (d, *J* = 7.2 Hz, 1H, Ar*H*), 8.31 (d, *J* = 7.2 Hz, 1H, Ar*H*), 8.79 (s, 1H, Ar*H*).<sup>11</sup>

A solution of pinacol ester (1.02 g, 0.700 mmol) and Pd/C (10%, 102 mg) in MeOH-CHCl<sub>3</sub> (2:1, 10 mL) was stirred under hydrogen at an atmospheric pressure at room temperature for overnight. The reaction mixture was then filtered through a pad of Celite, and the Celite filter cake was washed with CH<sub>2</sub>Cl<sub>2</sub>. The filtrate was concentrated in vacuo, and the residue was purified by column chromatography (silica gel, 1:1 *n*-hexane/AcOEt) to give amine **1g** (464 mg, 50%) as a light yellow solid: <sup>1</sup>H NMR (400 MHz, CDCl<sub>3</sub>):  $\delta$  1.35 (s, 12H, OC(CH<sub>3</sub>)<sub>2</sub>), 3.88 (s, 3H, CO<sub>2</sub>CH<sub>3</sub>), 4.84 (brs, 2H, NH<sub>2</sub>), 7.24 (d, *J* = 9.0 Hz, 2H, Ar*H*), 7.66

(d,  $J = 9.0$  Hz, 1H, ArH).<sup>10</sup>

## 5. Procedure for the preparation of 2-amino-4-(*tert*-butyldimethylsilyloxymethyl)phenylboronic acid pinacol ester (**1h**).

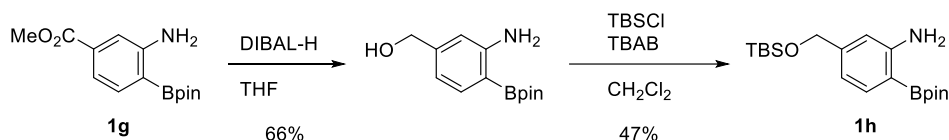

To a solution of **1g** (842 mg, 3.04 mmol) in THF (10 mL) was added DIBAL-H (1.0 M in Hex, 10.6 mL, 10.6 mmol) at  $-40$  °C. After stirring for 1.5 h at the same temperature, the mixture was allowed to warm to  $0$  °C. After stirring overnight, the reaction was quenched with saturated MeOH (5.0 mL) and saturated aqueous solution of Rochelle salt was successively added. The reaction mixture was then filtered through a pad of Celite, and the Celite filter cake was washed with CH<sub>2</sub>Cl<sub>2</sub>. The filtrate was extracted with CH<sub>2</sub>Cl<sub>2</sub> and the combined organic extracts were dried over anhydrous Na<sub>2</sub>SO<sub>4</sub>. Filtration and evaporation in vacuo furnished the crude product, which was purified by column chromatography (silica gel, 1:1 *n*-hexane/AcOEt) to give corresponding alcohol (498 mg, 66%) as a colorless oil: IR (KBr)  $\nu$  3385, 2977, 1617, 1434, 1359, 1144, 1056 cm<sup>-1</sup>; <sup>1</sup>H NMR (400 MHz, CDCl<sub>3</sub>):  $\delta$  1.34 (s, 12H, OC(CH<sub>3</sub>)<sub>2</sub>), 4.58 (s, 2H, OCH<sub>2</sub>Ar), 4.77 (brs, 2H, NH<sub>2</sub>), 6.60 (s, 1H, ArH), 6.64 (d,  $J = 7.2$  Hz, 1H, ArH), 7.59 (d,  $J = 7.2$  Hz, 1H, ArH); <sup>13</sup>C NMR (100 MHz, CDCl<sub>3</sub>):  $\delta$  24.9 (CH<sub>3</sub>), 65.2 (CH<sub>2</sub>), 83.5 (C), 112.7 (CH), 115.2 (CH), 137.1 (CH), 145.8 (C), 153.9 (C) (*C*-B was not detected.); HRMS (FAB) calcd for C<sub>13</sub>H<sub>20</sub>BNO<sub>3</sub> [M]<sup>+</sup> 249.1536, found 249.1540.

To a solution of alcohol (150 mg, 0.600 mmol) and TBAB (116 mg, 0.360 mmol) in CH<sub>2</sub>Cl<sub>2</sub> (3.0 mL) was added TBSCl (109 mg, 0.720 mmol) at room temperature under Ar atmosphere.<sup>12</sup> After stirring for overnight, the reaction was quenched with H<sub>2</sub>O and saturated aqueous NaHCO<sub>3</sub>. The mixture was extracted with CH<sub>2</sub>Cl<sub>2</sub> and the combined organic extracts were dried over anhydrous Na<sub>2</sub>SO<sub>4</sub>. Filtration and evaporation in vacuo furnished the crude product, which was purified by column chromatography (silica gel, 10:1 to 8:1 *n*-hexane/AcOEt) to give corresponding TBS ether (103 mg, 47%, azeotropically dried with toluene after column chromatography) as a colorless solid; mp 87-89 °C; IR (KBr)  $\nu$  3390, 2930, 1618, 1434, 1357, 1144, 1090 cm<sup>-1</sup>; <sup>1</sup>H NMR (400 MHz, CDCl<sub>3</sub>):  $\delta$  0.08 (s, 6H, SiCH<sub>3</sub>), 0.93 (s, 9H, *t*-Bu), 1.33 (s, 12H, OC(CH<sub>3</sub>)<sub>2</sub>), 4.65 (s, 2H, OCH<sub>2</sub>Ar), 4.73 (brs, 2H, NH<sub>2</sub>), 6.59-6.61 (m, 2H, ArH), 7.56 (d,  $J = 7.6$  Hz, 1H, ArH); <sup>13</sup>C NMR (100 MHz, CDCl<sub>3</sub>):  $\delta$  -5.26 (CH<sub>3</sub>), 18.4 (C), 24.9 (CH<sub>3</sub>), 26.0 (CH<sub>3</sub>), 64.9 (CH<sub>2</sub>), 83.4 (C), 112.0 (CH), 114.6 (CH), 136.7 (CH), 146.5 (C), 153.7 (C) (*C*-B was not detected.); HRMS (EI) calcd for C<sub>19</sub>H<sub>34</sub>BNO<sub>3</sub>Si [M+H]<sup>+</sup> 364.2474, found 364.2483.

## 6. Typical procedure for the one-pot benzyne generation/cycloaddition with azides:

### Preparation of 1-(4-methoxycarbonylphenyl)-1,2,3-benzotriazol (**5aa**).<sup>4</sup>

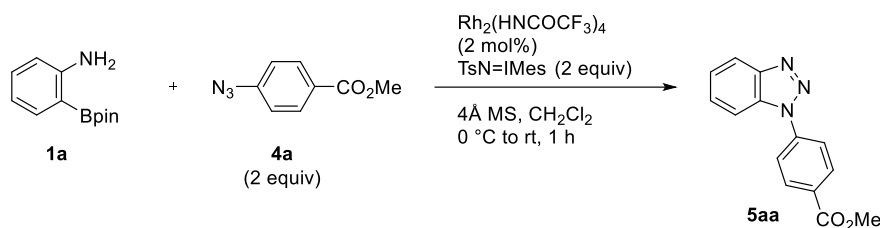

$\text{TsN=IMes}$  (83.1 mg, 0.200 mmol) was added to a stirred mixture of 2-aminophenylboronic acid pinacol ester (**1a**) (21.9 mg, 0.100 mmol), methyl 4-azidobenzoate (35.4 mg, 0.200 mmol),  $\text{Rh}_2(\text{HNCOCF}_3)_4$  (1.5 mg, 0.002 mmol, 2 mol %) and 4Å MS (powder, 40 mg) in  $\text{CH}_2\text{Cl}_2$  (1.0 mL) at 0 °C. After stirring at room temperature for 1 h, the whole mixture was filtered through a pad of Celite, and the filtrate was evaporated in vacuo to furnish the crude product, which was purified by column chromatography (silica gel, 3:1 *n*-hexane/AcOEt) to give benzotriazol **5aa** (14.6 mg, 58%) as a colorless solid: mp 154–156 °C; IR (KBr)  $\nu$  1720, 1607, 1290, 1106, 1060, 765  $\text{cm}^{-1}$ ;  $^1\text{H}$  NMR (400 MHz,  $\text{CDCl}_3$ ):  $\delta$  3.99 (s, 3H,  $\text{CO}_2\text{CH}_3$ ), 7.48 (t,  $J = 7.6$  Hz, 1H, ArH), 7.61 (t,  $J = 7.6$  Hz, 1H, ArH), 7.82 (d,  $J = 8.4$  Hz, 1H, ArH), 7.94 (d,  $J = 8.4$  Hz, 2H, ArH), 8.18 (d,  $J = 8.4$  Hz, 1H, ArH), 8.30 (d,  $J = 8.4$  Hz, 2H, ArH);  $^{13}\text{C}$  NMR (100 MHz,  $\text{CDCl}_3$ ):  $\delta$  52.4 ( $\text{CH}_3$ ), 110.3 (CH), 120.6 (CH), 121.9 (CH), 124.7 (CH), 128.7 (CH), 129.9 (C), 131.4 (CH), 131.9 (C), 140.5 (C), 146.7 (C), 166.0 (C=O); HRMS (FAB) calcd for  $\text{C}_{14}\text{H}_{11}\text{N}_3\text{O}_2$   $[\text{M}]^+$  253.0851, found 253.0850.

### 3-(*tert*-Butyldimethylsilyloxy)propyl 4-(1H-Benzotriazol-1-yl)benzoate (**5ab**)

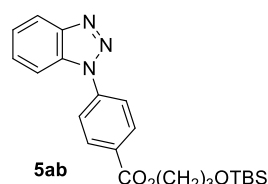

Yield 50% (19.7 mg); purified by column chromatography (silica gel, 4:1 *n*-hexane/ $\text{CH}_2\text{Cl}_2$ ); a colorless solid; mp 88–90 °C; IR (KBr)  $\nu$  2954, 1718, 1274, 1101, 835  $\text{cm}^{-1}$ ;  $^1\text{H}$  NMR (400 MHz,  $\text{CDCl}_3$ ):  $\delta$  0.08 (s, 6H,  $\text{SiCH}_3$ ), 0.92 (s, 9H, *t*-Bu), 2.03 (quintet,  $J = 6.4$  Hz, 2H,  $\text{CH}_2\text{CH}_2\text{CH}_2$ ), 3.82 (t,  $J = 6.4$  Hz, 2H,  $\text{CH}_2\text{OTBS}$ ), 4.50 (t,  $J = 6.4$  Hz, 2H,  $\text{CO}_2\text{CH}_2$ ), 7.49 (t,  $J = 7.6$  Hz, 1H, ArH), 7.62 (t,  $J = 7.6$  Hz, 1H, ArH), 7.83 (d,  $J = 8.0$  Hz, 1H, ArH), 7.94 (d,  $J = 8.8$  Hz, 2H, ArH), 8.19 (d,  $J = 8.0$  Hz, 1H, ArH), 8.31 (d,  $J = 8.8$  Hz, 2H, ArH);  $^{13}\text{C}$  NMR (100 MHz,  $\text{CDCl}_3$ ):  $\delta$  -5.4 ( $\text{CH}_3$ ), 18.3 (C), 25.9 ( $\text{CH}_3$ ), 31.8 ( $\text{CH}_2$ ), 59.4 ( $\text{CH}_2$ ), 62.4 ( $\text{CH}_2$ ), 110.3 (CH), 120.6 (CH), 122.0 (CH), 124.7 (CH), 128.7 (CH), 130.2 (C), 131.3 (CH), 131.9 (C), 140.5 (C), 146.7 (C), 165.5 (C=O); HRMS (FAB) calcd for  $\text{C}_{22}\text{H}_{30}\text{N}_3\text{O}_3\text{Si}$   $[\text{M}+\text{H}]^+$  412.2056, found 412.2050.

### 3-(*p*-Methoxybenzyloxy)propyl 4-(1*H*-Benzotriazol-1-yl)benzoate (**5ac**)

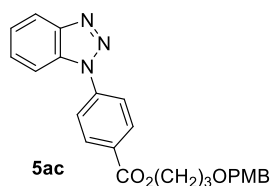

Yield 48%; purified by column chromatography (silica gel, 2:1 *n*-hexane/EtOAc); a colorless oil; IR (KBr)  $\nu$  2860, 1718, 1607, 1513, 1274, 1100, 1038  $\text{cm}^{-1}$ ;  $^1\text{H}$  NMR (400 MHz,  $\text{CDCl}_3$ ):  $\delta$  2.10 (quintet,  $J = 6.0$  Hz, 2H,  $\text{CH}_2\text{CH}_2\text{CH}_2$ ), 3.64 (t,  $J = 6.0$  Hz, 2H,  $\text{CH}_2\text{OPMB}$ ), 3.76 (s, 3H,  $\text{OCH}_3$ ), 4.48 (s, 2H,  $\text{OCH}_2\text{Ar}$ ), 4.50 (t,  $J = 6.0$  Hz, 2H,  $\text{CO}_2\text{CH}_2$ ), 6.86 (d,  $J = 8.8$  Hz, 2H, *ArH*), 7.27 (d,  $J = 8.8$  Hz, 2H, *ArH*), 7.48 (t,  $J = 8.0$  Hz, 1H, *ArH*), 7.61 (t,  $J = 8.0$  Hz, 1H, *ArH*), 7.82 (d,  $J = 8.0$  Hz, 1H, *ArH*), 7.91 (d,  $J = 8.8$  Hz, 2H, *ArH*), 8.18 (d,  $J = 8.0$  Hz, 1H, *ArH*), 8.23 (d,  $J = 8.8$  Hz, 2H, *ArH*);  $^{13}\text{C}$  NMR (100 MHz,  $\text{CDCl}_3$ ):  $\delta$  29.1 ( $\text{CH}_2$ ), 55.2 ( $\text{CH}_3$ ), 62.6 ( $\text{CH}_2$ ), 66.1 ( $\text{CH}_2$ ), 72.7 ( $\text{CH}_2$ ), 110.3 (CH), 113.8 (CH), 120.6 (CH), 121.9 (CH), 124.7 (CH), 128.7 (CH), 129.3 (CH), 130.1 (C), 130.3 (C), 131.3 (CH), 131.9 (C), 140.5 (C), 146.7 (C), 159.2 (C), 165.4 (C=O); HRMS (EI) calcd for  $\text{C}_{24}\text{H}_{23}\text{N}_3\text{O}_4$   $[\text{M}]^+$  417.1689, found 417,1692.

### 1-Phenylmethyl-1,2,3-benzotriazol (**5ad**)<sup>13</sup>

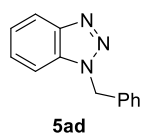

Yield 56% (11.7 mg); purified by column chromatography (silica gel, 3:1 *n*-hexane/AcOEt); a colorless solid;  $^1\text{H}$  NMR (300 MHz,  $\text{CDCl}_3$ ):  $\delta$  5.85 (s, 2H,  $\text{NCH}_2\text{Ph}$ ), 7.26-7.43 (m, 8H, *ArH*), 8.07 (dd,  $J = 1.2, 8.7$  Hz, 1H, *ArH*).

### 1-Trimethylsilylmethyl-1,2,3-benzotriazol (**5ae**)<sup>14</sup>

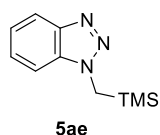

Yield 56% (11.6 mg); purified by column chromatography (silica gel, 4:1 *n*-hexane/AcOEt); a colorless solid;  $^1\text{H}$  NMR (400 MHz,  $\text{CDCl}_3$ ):  $\delta$  0.21 (s, 9H,  $\text{SiCH}_3$ ), 4.04 (s, 2H,  $\text{NCH}_2\text{TMS}$ ), 7.35 (ddd,  $J = 2.4, 6.0, 8.4$  Hz, 1H, *ArH*), 7.46-7.48 (m, 2H, *ArH*), 8.04 (d,  $J = 8.4$  Hz, 1H, *ArH*).

### 1-Ethoxycarbonylmethyl-1,2,3-benzotriazol (**5af**)<sup>13</sup>

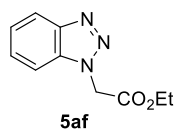

Yield 61% (12.5 mg); purified by column chromatography (silica gel, 2:1 *n*-hexane/AcOEt); a colorless solid;  $^1\text{H}$  NMR (400 MHz,  $\text{CDCl}_3$ ):  $\delta$  1.27 (t,  $J = 7.2$  Hz, 3H,  $\text{CO}_2\text{CH}_2\text{CH}_3$ ), 4.26 (q,  $J = 7.2$  Hz, 2H,  $\text{CO}_2\text{CH}_2\text{CH}_3$ ), 5.43 (s, 2H,  $\text{NCH}_2\text{CO}_2$ ), 7.40 (ddd,  $J = 1.5, 6.3, 8.4$  Hz, 1H, *ArH*), 7.46-7.56 (m, 2H, *ArH*), 8.10 (dt,  $J = 0.9, 8.4$  Hz, 1H, *ArH*).



### 2-(1*H*-Benzotriazol-1-yl)ethyl 2,3,4,6-Tetra-*O*-acetyl- $\beta$ -D-glucopyranoside (5ag)

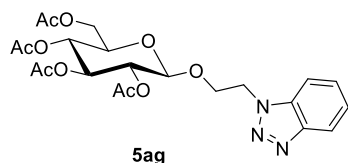

5ag

Yield 58% (28.4 mg); purified by column chromatography (silica gel, 1:1 to 1:2 *n*-hexane/EtOAc); a colorless oil;  $[\alpha]_D^{24} = -46.8$  (*c* 1.01, CHCl<sub>3</sub>); IR (KBr)  $\nu$  2956, 1753, 1368, 1229, 1041 cm<sup>-1</sup>; <sup>1</sup>H NMR (400 MHz, CDCl<sub>3</sub>):  $\delta$  1.55 (s, 3H, COCH<sub>3</sub>), 1.96

(s, 3H, COCH<sub>3</sub>), 2.01 (s, 3H, COCH<sub>3</sub>), 2.10 (s, 3H, COCH<sub>3</sub>), 3.64-3.68 (m, 1H, H-5), 4.08-4.11 (m, 2H, CH<sub>2</sub>N), 4.22 (dd, *J* = 4.8, 12.4 Hz, 1H, H-6a), 4.38-4.45 (m, 2H, OCHH and H-6b), 4.81-4.93 (m, 3H, OCHH, H-1 and H-2), 5.04 (t, *J* = 9.2 Hz, 1H, H-3), 5.09 (t, *J* = 9.2 Hz, 1H, H-4), 7.38 (ddd, *J* = 1.2, 6.8, 8.0 Hz, 1H, ArH), 7.50 (ddd, *J* = 1.2, 6.8, 8.0 Hz, 1H, ArH), 7.57 (d, *J* = 8.0 Hz, 1H, ArH), 8.04 (d, *J* = 8.0 Hz, 1H, ArH); <sup>13</sup>C NMR (100 MHz, CDCl<sub>3</sub>):  $\delta$  20.1 (CH<sub>3</sub>), 20.4 (CH<sub>3</sub>), 20.5 (CH<sub>3</sub>), 20.7 (CH<sub>3</sub>), 47.9 (CH<sub>2</sub>), 61.6 (CH<sub>2</sub>), 68.0 (CH), 68.5 (CH<sub>2</sub>), 70.7 (CH), 71.9 (CH), 72.6 (CH), 100.5 (CH), 110.1 (CH), 119.6 (CH), 123.9 (CH), 127.6 (CH), 133.9 (C), 145.7 (C), 169.1 (C=O), 169.3 (C=O), 170.1 (C=O), 170.6 (C=O); HRMS (FAB) calcd for C<sub>22</sub>H<sub>27</sub>N<sub>3</sub>O<sub>10</sub> [M]<sup>+</sup> 493.1696, found 493.1696.

### 3'-(1*H*-Benzotriazol-1-yl)-5'-*O*-*tert*-butyldimethylsilyl-3'-deoxythymidine (5ah)

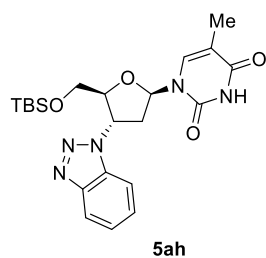

5ah

Yield 58% (26.4 mg); purified by column chromatography (silica gel, 1:2 *n*-hexane/EtOAc); a colorless amorphous; IR (KBr)  $\nu$  2929, 1696, 1470, 1273, 1126 cm<sup>-1</sup>; <sup>1</sup>H NMR (400 MHz, CDCl<sub>3</sub>):  $\delta$  0.11 (s, 3H, SiCH<sub>3</sub>), 0.14 (s, 3H, SiCH<sub>3</sub>), 0.96 (s, 9H, *t*-Bu), 2.00 (s, 3H, ArCH<sub>3</sub>), 2.72 (ddd, *J* = 6.0, 8.4, 14.0 Hz, 1H, H-2'a), 3.22 (dt, *J* = 6.0, 14.0 Hz, 1H, H-2'b), 3.79 (dd, *J* = 2.0, 11.6 Hz, 1H, H-5'a), 4.07 (dd, *J* = 2.0,

11.6 Hz, 1H, H-5'b), 4.63-4.64 (m, 1H, H-4'), 5.58 (dt, *J* = 5.2, 8.8 Hz, 1H, H-3'), 6.57 (t, *J* = 6.4 Hz, 1H, H-1'), 7.42 (t, *J* = 7.6 Hz, 1H, ArH), 7.53-7.59 (m, 3H, 2×ArH and N-CH=C), 8.13 (d, *J* = 8.4 Hz, 1H, ArH), 8.34 (s, 1H, NH); <sup>13</sup>C NMR (400 MHz, CDCl<sub>3</sub>):  $\delta$  -5.4 (CH<sub>3</sub>), -5.3 (CH<sub>3</sub>), 12.6 (CH<sub>3</sub>), 18.4 (C), 25.9 (CH<sub>3</sub>), 38.0 (CH<sub>2</sub>), 56.9 (CH), 62.3 (CH<sub>2</sub>), 84.1 (CH), 85.7 (CH), 108.9 (CH), 111.1 (C), 120.4 (CH), 124.4 (CH), 127.8 (CH), 132.7 (C), 135.5 (CH), 146.1 (C), 150.1 (C=O), 163.7 (C=O); HRMS (FAB) calcd for C<sub>22</sub>H<sub>31</sub>N<sub>5</sub>O<sub>4</sub>Si [M+H]<sup>+</sup> 458.2218, found 458.2224.

**5-Bromo-1-(4-Methoxycarbonylphenyl)-1,2,3-benzotriazol and 6-Bromo-1-(4-Methoxycarbonylphenyl)-1,2,3-benzotriazol (5ea)**

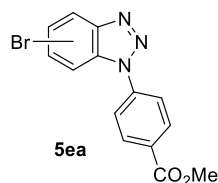

Yield 45% (~1:1 mixture of regioisomers, 14.8 mg); purified by column chromatography (silica gel, 6:1 *n*-hexane/EtOAc); a colorless solid; IR (KBr)  $\nu$  1722, 1604, 1514, 1438, 1288, 1112, 1063  $\text{cm}^{-1}$ ;  $^1\text{H}$  NMR (400 MHz,  $\text{DMSO}-d_6$ ):  $\delta$  3.93 (s,  $2\times 3\text{H}$ ,  $\text{CO}_2\text{CH}_3$ ), 7.71 (dd,  $J = 1.6, 8.8$  Hz, 1H, ArH), 7.84 (dd,  $J = 1.6, 8.8$  Hz, 1H, ArH), 8.03 (d,  $J = 8.8$  Hz, 1H, ArH), 8.08-8.12 (m, 4H, ArH), 8.20 (d,  $J = 8.8$  Hz, 1H, ArH), 8.23-8.26 (m, 4H, ArH), 8.32 (d,  $J = 1.6$  Hz, 1H, ArH), 8.54 (d,  $J = 1.6$  Hz, 1H, ArH); HRMS (EI) calcd for  $\text{C}_{14}\text{H}_{10}\text{BrN}_3\text{O}_2$   $[\text{M}]^+$  330.9956, found 330.9948.

**Methyl 4-[5-(2-Methoxy-2-oxo-1-phenylethyl)-1H-benzotriazol-1-yl]benzoate and Methyl 4-[6-(2-Methoxy-2-oxo-1-phenylethyl)-1H-benzotriazol-1-yl]benzoate (5fa)**

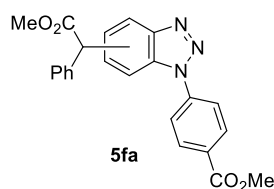

Yield 51% (1:0.85 mixture of regioisomers, 19.5 mg); purified by column chromatography (silica gel, 2:1 *n*-hexane/EtOAc and  $\text{CH}_2\text{Cl}_2$  to 10:1  $\text{CH}_2\text{Cl}_2/\text{Et}_2\text{O}$ ); a colorless solid; IR (KBr)  $\nu$  1731, 1606, 1516, 1435, 1280, 1162  $\text{cm}^{-1}$ ;  $^1\text{H}$  NMR (400 MHz,  $\text{CDCl}_3$ ):  $\delta$  3.78 (s, 3H,  $\text{CO}_2\text{CH}_3$ ), 3.79 (s, 3H,  $\text{CO}_2\text{CH}_3$ ), 3.98 (s, 3H,  $\text{CO}_2\text{CH}_3$ ), 3.99 (s, 3H,  $\text{CO}_2\text{CH}_3$ ), 5.25 (s,  $2\times 1\text{H}$ ,  $\text{Ar}_2\text{CHCO}$ ) 7.32-7.35 (m,  $2\times 5\text{H}$ , ArH), 7.44 (d,  $J = 8.4$  Hz, 1H, ArH for minor product), 7.58 (d,  $J = 8.4$  Hz, 1H, ArH for major product), 7.74-7.78 (m,  $2\times 1\text{H}$ , ArH), 7.86-7.91 (m,  $2\times 2\text{H}$ , ArH), 8.09-8.11 (m,  $2\times 1\text{H}$ , ArH), 8.29 (d,  $J = 8.4$  Hz,  $2\times 2\text{H}$ , ArH); HRMS (FAB) calcd for  $\text{C}_{23}\text{H}_{19}\text{N}_3\text{O}_4$   $[\text{M}]^+$  401.1376, found 401.1377.

**Methyl 1-(4-Methoxycarbonylphenyl)-1,2,3-benzotriazole-5-carboxylate and Methyl 1-(4-Methoxycarbonylphenyl)-1,2,3-benzotriazole-6-carboxylate (5ga)**

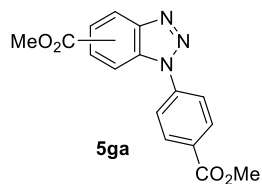

Yield 58% (1:0.77 mixture of regioisomers, 17.9 mg); purified by column chromatography (silica gel, 3:1  $\text{CH}_2\text{Cl}_2$  to 20:1  $\text{CH}_2\text{Cl}_2/\text{Et}_2\text{O}$ ); a colorless solid;  $^1\text{H}$  NMR (400 MHz,  $\text{CDCl}_3$ ):  $\delta$  4.00-4.01 (s,  $2\times 3\text{H}$ ,  $\text{CO}_2\text{CH}_3$  for major product and s,  $2\times 3\text{H}$ ,  $\text{CO}_2\text{CH}_3$  for minor product), 7.84 (d,  $J = 8.8$  Hz, 1H, ArH for minor product), 7.92-7.96 (m, 2H, ArH for major product and 2H, ArH for minor product), 8.15 (d,  $J = 8.8$  Hz, 1H, ArH for major product), 8.22 (d,  $J = 8.8$  Hz, 1H, ArH for major product), 8.29-8.35 (m, 2H, ArH for major product and 3H, ArH for minor product), 8.53 (s, 1H, ArH for major product), 8.90 (s, 1H, ArH for minor product); HRMS (EI) calcd for  $\text{C}_{16}\text{H}_{13}\text{N}_3\text{O}_4$   $[\text{M}]^+$  311.0906, found 311.0910.

**5-(*tert*-Butyldimethylsilyloxymethyl)-1-(4-methoxycarbonylphenyl)-1,2,3-benzotriazol and 6-(*tert*-Butyldimethylsilyloxymethyl)-1-(4-Methoxycarbonylphenyl)-1,2,3-benzotriazol (5ha)**

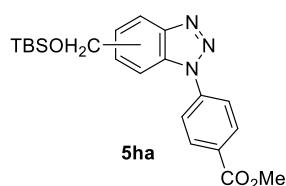

Yield 42% (1:0.80 mixture of regioisomers, 16.8 mg); purified by column chromatography (silica gel, 6:1 *n*-hexane/EtOAc); a colorless oil; IR (KBr)  $\nu$  2953, 1718, 1607, 1515, 1437, 1278, 1103, 851  $\text{cm}^{-1}$ ;  $^1\text{H}$  NMR (400 MHz,  $\text{CDCl}_3$ ):  $\delta$  0.14 (s, 6H,  $\text{SiCH}_3$  for major product), 0.15 (s, 6H,  $\text{SiCH}_3$  for minor product), 0.97 (s, 9H, *t*-Bu for minor product), 0.98 (s, 9H, *t*-Bu for major product), 3.99 (s, 3H,  $\text{CO}_2\text{CH}_3$  for minor product and 3H,  $\text{CO}_2\text{CH}_3$  for major product), 4.93 (s, 2H,  $\text{OCH}_2\text{Ar}$  for minor product), 4.94 (s, 2H,  $\text{OCH}_2\text{Ar}$  for major product), 7.36 (d,  $J = 8.4$  Hz, 1H, *ArH* for major product), 7.57 (d,  $J = 8.4$  Hz, 1H, *ArH* for minor product), 7.77 (d,  $J = 8.4$  Hz, 1H, *ArH* for minor product), 7.85 (s, 1H, *ArH* for major product), 7.93-7.96 (m, 2H, *ArH* for major product and 2H, *ArH* for minor product), 8.09 (d,  $J = 8.4$  Hz, 1H, *ArH* for major product), 8.13 (s, 1H, *ArH* for minor product), 8.28-8.30 (m, 2H, *ArH* for major product and 2H, *ArH* for minor product); HRMS (FAB) calcd for  $\text{C}_{21}\text{H}_{27}\text{N}_3\text{O}_3\text{Si}$   $[\text{M}]^+$  397.1822, found 397.1826.

**7. Typical procedure for the one-pot benzyne generation/cycloaddition with furans.**

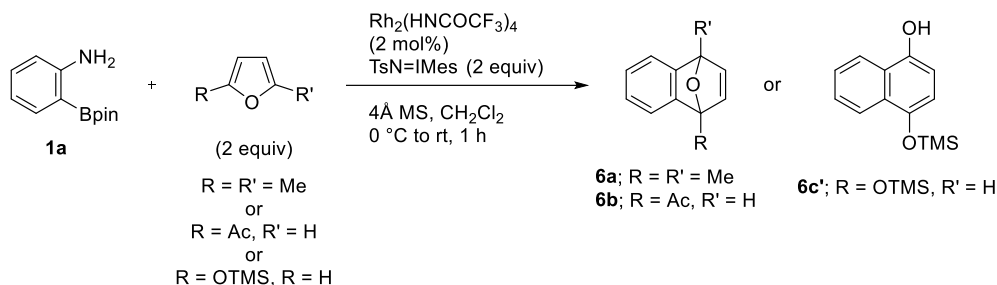

$\text{TsN=IMes}$  (83.1 mg, 0.200 mmol) was added to a stirred mixture of 2-aminophenylboronic acid pinacol ester (**1a**) (21.9 mg, 0.100 mmol), furan (0.200 mmol),  $\text{Rh}_2(\text{HNCOF}_3)_4$  (1.5 mg, 0.002 mmol, 2 mol %) and  $4\text{\AA}$  MS (powder, 40 mg) in  $\text{CH}_2\text{Cl}_2$  (1.0 mL) at  $0\text{ }^\circ\text{C}$ . After stirring at room temperature for 1 h, the whole mixture was filtered through a pad of Celite, and the filtrate was evaporated in vacuo to furnish the crude product, which was purified by column chromatography to give cycloadduct **6**.

### 1,4-Dimethyl-1,4-dihydro-1,4-epoxynaphthalene (6a)<sup>15</sup>

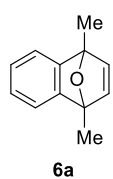

Yield 52% (8.9 mg); purified by column chromatography (silica gel, 10:1 *n*-hexane/EtOAc); a colorless oil; <sup>1</sup>H NMR (300 MHz, CDCl<sub>3</sub>): δ 1.89 (s, 6H, CH<sub>3</sub>), 6.77 (s, 2H, CH=CH), 6.97 (dd, *J* = 3.0, 5.1 Hz, 2H, ArH), 7.13 (dd, *J* = 3.0, 5.1 Hz, 2H, ArH).

### 1-Acetyl-1,4-dihydro-1,4-epoxynaphthalene (6b)<sup>16</sup>

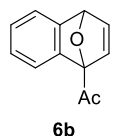

Yield 46% (8.6 mg); purified by column chromatography (silica gel, 10:1 *n*-hexane/EtOAc); a colorless oil; <sup>1</sup>H NMR (400 MHz, CDCl<sub>3</sub>): δ 2.40 (s, 3H, COCH<sub>3</sub>), 5.80 (d, *J* = 1.8 Hz, 1H, CH-CH=CH), 6.98-7.07 (m, 4H, CH=CH, ArH), 7.24-7.29 (m, 2H, ArH).

### 4-(Trimethylsilyloxy)naphthalene-1-ol (6c')

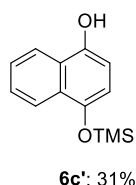

6c'; 31%

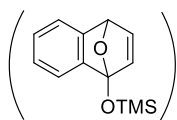

6c; ND

Yield 31% (7.3 mg); purified by column chromatography (silica gel, 10:1 *n*-hexane/EtOAc); a colorless oil; IR (KBr)  $\nu$  3385, 2959, 1595, 1471, 1071 cm<sup>-1</sup>; <sup>1</sup>H NMR (400 MHz, CDCl<sub>3</sub>): δ 0.31 (s, 9H, SiCH<sub>3</sub>), 4.95 (brs, 1H, OH), 6.91 (dd, *J* = 4.0, 8.8 Hz, 2H, ArH), 7.49 (ddd, *J* = 0.8, 4.0, 8.8 Hz, 2H, ArH), 8.07–8.11 (m, 2H, ArH); <sup>13</sup>C NMR (100 MHz, CDCl<sub>3</sub>): δ 0.3 (CH<sub>3</sub>), 108.3 (CH), 112.4 (CH), 121.5 (CH), 122.7 (CH), 125.3 (C), 125.6 (CH), 125.7 (CH), 128.5 (C), 145.2 (C), 145.6 (C); HRMS (EI) calcd for C<sub>13</sub>H<sub>16</sub>O<sub>2</sub>Si [M]<sup>+</sup> 232.0920, found 232.0918.

### 8. Procedure for the preparation of 5-methoxy-2-(2-tosylhydrazineyl)phenylboronic acid pinacol ester (8c).

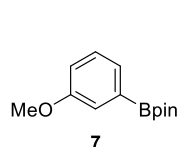

7

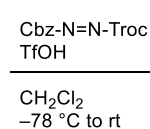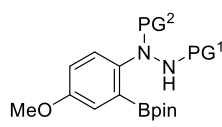

8a; PG<sup>1</sup> = Troc, PG<sup>2</sup> = Cbz

8b; PG<sup>1</sup> = H, PG<sup>2</sup> = Cbz

8c; PG<sup>1</sup> = Ts, PG<sup>2</sup> = H

↓ In, NH<sub>4</sub>Cl  
EtOH-H<sub>2</sub>O  
1) H<sub>2</sub>, Pd/C, MeOH  
2) TsCl, pyridine

To a solution of **7** (375 mg, 1.60 mmol) and 2,2,2-trichloroethyl benzyl azodicarboxylate<sup>17</sup> (652 mg, 1.92 mmol) in CH<sub>2</sub>Cl<sub>2</sub> (8.0 mL) was added TfOH (14  $\mu$ L, 0.160 mmol) at -78 °C, and the mixture was allowed to warm to room temperature. After stirring for 6 h, the reaction was quenched with saturated aqueous NH<sub>4</sub>Cl, and the mixture was extracted with CH<sub>2</sub>Cl<sub>2</sub>. The combined organic extracts were dried over anhydrous Na<sub>2</sub>SO<sub>4</sub>. Filtration and evaporation in vacuo furnished the crude product, which was purified by column chromatography (silica gel, 4:1 *n*-hexane/EtOAc) to give hydrazine **8a** (1:0.32

mixture of diastereoisomers, 829 mg, 90%,) as a colorless amorphous: IR (KBr)  $\nu$  3386, 2978, 1735, 1344, 1218, 1048  $\text{cm}^{-1}$ ;  $^1\text{H}$  NMR (400 MHz,  $\text{CDCl}_3$ ):  $\delta$  1.27 (s, 12H,  $\text{OC}(\text{CH}_3)_2$  for minor isomer), 1.29 (s, 12H,  $\text{OC}(\text{CH}_3)_2$  for major isomer), 3.78 (s, 3H,  $\text{OCH}_3$ ), 4.74 (s, 2H,  $\text{OCH}_2\text{Ph}$  for major isomer), 4.85 (s, 2H,  $\text{OCH}_2\text{Ph}$  for minor isomer), 5.11 (s, 2H,  $\text{OCH}_2\text{CCl}_3$  for minor isomer), 5.15 (s, 2H,  $\text{OCH}_2\text{CCl}_3$  for major isomer), 7.05 (dd,  $J = 2.8, 8.8$  Hz, 1H,  $\text{ArH}$ ), 7.16 (d,  $J = 2.8$  Hz, 1H,  $\text{ArH}$ ), 7.32-7.38 (m, 6H,  $\text{ArH}$ ), 8.94 (brs, 1H,  $\text{NH}$ ); HRMS (EI) calcd for  $\text{C}_{24}\text{H}_{28}\text{BCl}_3\text{N}_2\text{O}_7$   $[\text{M}]^+$  572.1055, found 572.1056.

To a solution of **8a** (760 mg, 1.32 mmol) and  $\text{NH}_4\text{Cl}$  (213 mg, 3.97 mmol) in  $\text{EtOH-H}_2\text{O}$  (3:2, 6.7 mL) was added In (powder, 304 mg, 2.65 mmol) at 60  $^\circ\text{C}$ . After stirring at the same temperature for 6 h, the whole mixture was filtered through a pad of Celite, and the Celite filter cake was washed with  $\text{CH}_2\text{Cl}_2$ . The filtrate was extracted with  $\text{CH}_2\text{Cl}_2$  and the combined organic extracts were dried over anhydrous  $\text{Na}_2\text{SO}_4$ . Filtration and evaporation in vacuo furnished the crude product, which was purified by column chromatography (silica gel, 3:1 *n*-hexane/ $\text{EtOAc}$ ) to hydrazine **8b** (315 mg, 60%) as a brown oil: IR (KBr)  $\nu$  3352, 2978, 1732, 1418, 1349, 1214, 1142, 1058  $\text{cm}^{-1}$ ;  $^1\text{H}$  NMR (300 MHz,  $\text{CD}_3\text{OD}$ , 60  $^\circ\text{C}$ ):  $\delta$  1.34 (s, 12H,  $\text{OCH}(\text{CH}_3)_2$ ), 3.74 (s, 3H,  $\text{OCH}_3$ ), 5.11 (s, 2H,  $\text{OCH}_2\text{Ph}$ ), 6.79 (d,  $J = 9.0$  Hz, 1H,  $\text{ArH}$ ), 6.93 (dd,  $J = 3.0, 9.0$  Hz, 1H,  $\text{ArH}$ ), 7.17 (d,  $J = 3.0$  Hz, 1H,  $\text{ArH}$ ), 7.26-7.36 (m, 5H,  $\text{ArH}$ );  $^{13}\text{C}$  NMR (100 MHz,  $\text{CD}_3\text{OD}$ , 60  $^\circ\text{C}$ ):  $\delta$  25.1 ( $\text{CH}_3$ ), 56.3 ( $\text{CH}_3$ ), 68.0 ( $\text{CH}_2$ ), 85.4 (C), 114.6 (CH), 120.6 (CH), 121.5 (CH), 128.0 (CH), 128.8 (C), 129.1 (CH), 129.3 (C), 129.42 (C), 129.43 (CH), 154.5 (C=O) (C-B was not detected.); HRMS (EI) calcd for  $\text{C}_{21}\text{H}_{27}\text{BN}_2\text{O}_5$   $[\text{M}]^+$  398.2013, found 398.2019.

A solution of **8b** (84.4 mg, 0.212 mmol) and  $\text{Pd/C}$  (9.0 mg) in  $\text{MeOH}$  (2.2 mL) was stirred under hydrogen at an atmospheric pressure at room temperature for 3 h. The reaction mixture was then filtered through a pad of Celite, and the Celite filter cake was washed with  $\text{CH}_2\text{Cl}_2$ - $\text{MeOH}$ . The filtrate was concentrated in vacuo, and the residue was used without further purification.

To a solution of the crude product in pyridine (0.50 mL),  $\text{TsCl}$  (100 mg, 0.530 mmol) was added at 0  $^\circ\text{C}$ . After stirring at room temperature for 2 h, the reaction was quenched with water, and the mixture was extracted with  $\text{CH}_2\text{Cl}_2$ . The combined organic extracts were dried over anhydrous  $\text{Na}_2\text{SO}_4$ . Filtration and evaporation in vacuo furnished the crude product, which was purified by column chromatography (silica gel, 3:1 to 2:1 *n*-hexane/ $\text{EtOAc}$ ) to *N*-tosylhydrazine **8c** (30.8 mg, 35%) as a beige solid: IR (KBr)  $\nu$  3344, 2978, 1466, 1423, 1308, 1167  $\text{cm}^{-1}$ ;  $^1\text{H}$  NMR (400 MHz,  $\text{CDCl}_3$ ):  $\delta$  1.26 (s, 12H,  $\text{OC}(\text{CH}_3)_2$ ), 2.41 (s, 3H,  $\text{ArCH}_3$ ), 3.73 (s, 3H,  $\text{OCH}_3$ ), 6.26 (s, 1H,  $\text{NH}$ ), 6.82 (dd,  $J = 2.8, 8.8$  Hz, 1H,  $\text{ArH}$ ), 6.96 (d,  $J = 8.8$  Hz, 1H,  $\text{ArH}$ ), 7.0 (d,  $J = 2.8$  Hz, 1H,  $\text{ArH}$ ), 7.22 (s, 1H,  $\text{NH}$ ), 7.26 (d,

$J = 8.8$  Hz, 2H, ArH), 7.77 (d,  $J = 8.8$  Hz, 2H, ArH);  $^{13}\text{C}$  NMR (100 MHz,  $\text{CDCl}_3$ ):  $\delta$  21.5 ( $\text{CH}_3$ ), 24.7 ( $\text{CH}_3$ ), 55.8 ( $\text{CH}_3$ ), 83.9 (C), 114.5 (CH), 119.6 (CH), 119.9 (CH), 128.2 (CH), 129.5 (CH), 135.1 (C), 144.0 (C), 147.1 (C), 153.0 (C) (C-B was not detected.); HRMS (EI) calcd for  $\text{C}_{20}\text{H}_{27}\text{BN}_2\text{O}_5\text{S}$   $[\text{M}]^+$  418.1734, found 418.1743.

## 9. Procedure for the cycloaddition of *N*-tosylhydrazine **8c** with methyl 4-azidobenzoate (**4a**).

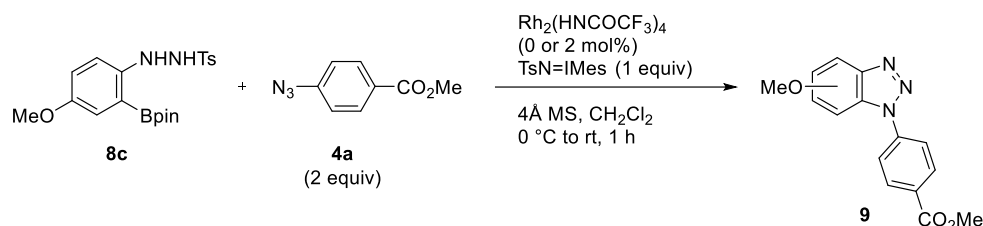

$\text{TsN=IMes}$  (30.7 mg, 0.0736 mmol) was added to a stirred mixture of *N*-tosylhydrazine **8c** (30.8 mg, 0.0736 mmol), methyl 4-azidobenzoate (26.2 mg, 0.148 mmol),  $\text{Rh}_2(\text{HNCOCF}_3)_4$  (1.0 mg, 0.0015 mmol, 2 mol %) and 4 Å MS (powder, 40 mg) in  $\text{CH}_2\text{Cl}_2$  (1.0 mL) at 0 °C. After stirring at room temperature for 1 h, the whole mixture was filtered through a pad of Celite, and the filtrate was evaporated in vacuo to furnish the crude product, which was purified by column chromatography (silica gel, 2:1 *n*-hexane/AcOEt) to give benzotriazol **9** (1:0.87 mixture of regioisomers, 12.3 mg, 59%) as a colorless solid: IR (KBr)  $\nu$  3422, 2958, 1720, 1607, 1495, 1436, 1280, 1115  $\text{cm}^{-1}$ ;  $^1\text{H}$  NMR (400 MHz,  $\text{CDCl}_3$ ):  $\delta$  3.92 (s, 3H,  $\text{OCH}_3$  for minor isomer), 3.94 (s, 3H,  $\text{OCH}_3$  for major isomer), 3.99 (s, 3H,  $\text{CO}_2\text{CH}_3$  for minor isomer), 3.99 (s, 3H,  $\text{CO}_2\text{CH}_3$  for major isomer), 7.07-7.11 (m, ArH, 1H for major isomer and 1H for minor isomer), 7.26 (dd,  $J = 2.4, 8.8$  Hz, 1H, ArH for minor isomer), 7.48 (d,  $J = 2.4$  Hz, 1H, ArH for major isomer), 7.68 (d,  $J = 8.8$  Hz, 1H, ArH for major isomer), 7.88-7.93 (m, 2H, ArH), 8.01 (d,  $J = 8.8$  Hz, 1H, ArH for minor isomer), 8.27-8.30 (m, 2H, ArH); HRMS (EI) calcd for  $\text{C}_{15}\text{H}_{13}\text{N}_3\text{O}_3$   $[\text{M}]^+$  283.0957, found 283.0960.

## References

1. (a) C. G. Espino, K. W. Fiori, M. Kim, J. Du Bois, *J. Am. Chem. Soc.* **2004**, *126*, 15378–15379. (b) K. P. Kornecki, J. F. Berry, *Eur. J. Inorg. Chem.* **2012**, 562–568.
2. (a) K. Guthikonda, J. Du Bois, *J. Am. Chem. Soc.* **2002**, *124*, 13672–13673. (b) E. Martinand-Lurin, R. Gruber, P. retailleau, P. Fleurat-Lessard, P. Dauban, *J. Org. Chem.* **2015**, *80*, 1414–1426.
3. M. Ito, A. Tanaka, K. Higuchi, S. Sugiyama, *Eur J. Org. Chem.* **2017**, 1272.
4. H. Fang, G. Kaur, J. Yan, B. Wang, *Tetrahedron Lett.* **2005**, *46*, 1671.
5. J. W. J. Kennedy, D. G. Hall, *J. Organomet. Chem.* **2003**, *680*, 263.
6. N. N. Bhuvan Kumar, O. A. Mukhina, A. G. Kutateladze, *J. Am. Chem. Soc.* **2013**, *135*, 9608.
7. S. K. V. Vernekar, L. Qiu, J. Zhang, J. Kankanala, H. Li, R. J. Geraghty, Z. Wang, *J. Med. Chem.* **2015**, *58*, 4016.
8. A. N. Rai, A. Basu, *Tetrahedron Lett.* **2003**, *44*, 2267.
9. (a) Z. Yu, B. Ma, M. Chen, H.-H. Wu, L. Liu, J. Zhang, *J. Am. Chem. Soc.* **2014**, *136*, 6904. (b) Y. Xi, Y. Su, Z. Yu, B. Dong, E. J. McClain, Y. Lan, X. Shi, *Angew. Chem. Int. Ed.* **2014**, *53*, 9817.
10. P. Larson, T. A. Kucaba, Z. Xiong, M. Olin, T. S. Griffith, D. M. Ferguson, *ACS Med. Chem. Lett.* **2017**, *8*, 1148.
11. M. Ogawa, K. Kitagawa, H. Shirahashi, S. Kuribayashi, WO 2009148052, December 10, 2009.
12. B. Sreedhar, V. S. Rawat, *J. Applicable. Chem.* **2012**, *1*, 174.
13. L. Campbell-Verduyn, P. H. Elsinga, L. Mirfeizi, R. A. Dierckx, B. L. Feringa, *Org. Biomol. Chem.* **2008**, *6*, 3461.
14. B. I. Roman, T. De Ryck, L. Dierickx, B. W. A. Vanhoecke, A. R. Katritzky, M. Bracke, C. V. Stevens, *Bioorg. Med. Chem.* **2012**, *20*, 4812.
15. Y. Sumida, T. Kato, T. Hosoya, *Org. Lett.* **2013**, *15*, 2806.
16. R. R. Burton, W. Tam, *Tetrahedron Lett.* **2006**, *47*, 7185.
17. H. Mitchell, Y. Leblanc, *J. Org. Chem.* **1994**, *59*, 682.

### 3-(*tert*-Butyldimethylsilyloxy)propyl 4-Azidobenzoate (4b)

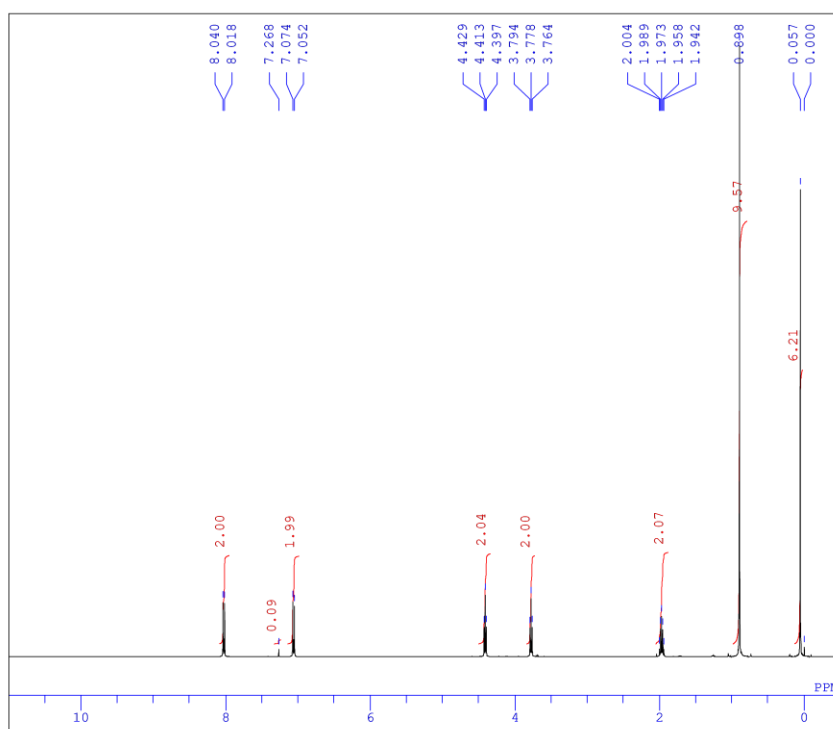

DFILE 4-N3C6H4CO2 (CH2) 3OT  
 COMNT single\_pulse  
 DATIM 2019-05-23 12:27:44  
 OBNUC 1H  
 EXMOD single\_pulse.jxp  
 OBFRQ 399.78 MHz  
 OBSET 4.19 KHz  
 OBFIN 7.29 Hz  
 POINT 26214  
 FREQU 6002.40 Hz  
 SCANS 8  
 ACQTM 4.3673 sec  
 PD 5.0000 sec  
 PW1 3.35 usec  
 IRNUC 1H  
 CTEMP 21.4 c  
 SLVNT CDCL3  
 EXREF 0.00 ppm  
 BF 0.21 Hz  
 RGAIN 22

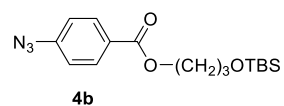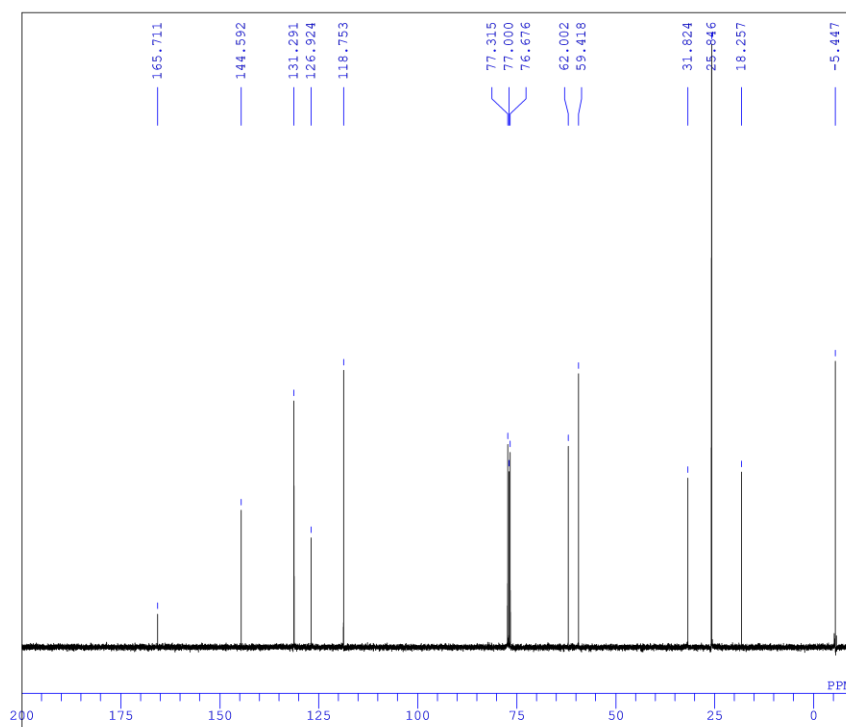

DFILE 4-N3C6H4CO2 (CH2) 3OT  
 COMNT single\_pulse\_decoup  
 DATIM 2019-05-23 12:29:30  
 OBNUC 13C  
 EXMOD single\_pulse\_dec  
 OBFRQ 100.53 MHz  
 OBSET 5.35 KHz  
 OBFIN 5.86 Hz  
 POINT 26214  
 FREQU 25125.63 Hz  
 SCANS 256  
 ACQTM 1.0433 sec  
 PD 2.0000 sec  
 PW1 3.60 usec  
 IRNUC 1H  
 CTEMP 21.4 c  
 SLVNT CDCL3  
 EXREF 77.00 ppm  
 BF 0.21 Hz  
 RGAIN 60



### 3-Hydroxypropyl 4-Azidobenzoate (4c')

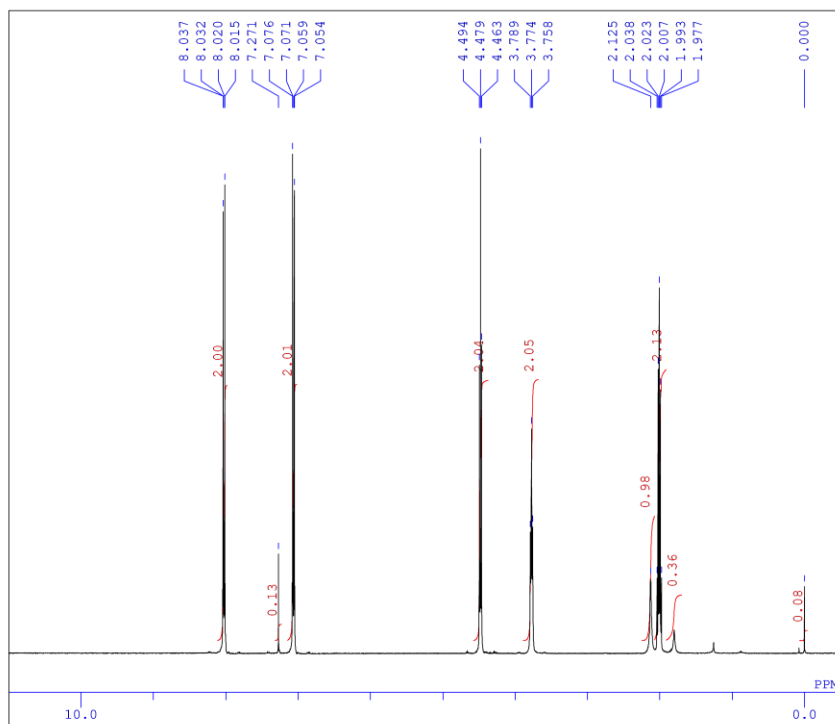

DFILE 4-N3C6H4CO2 (CH2) 3OH  
 COMNT Thu May 30 12:21:56  
 DATIM 1H  
 EXMOD NON  
 OBFREQ 399.65 MHz  
 OBSET 124.00 KHz  
 OBFIN 10500.00 Hz  
 POINT 16384  
 FREQU 7992.01 Hz  
 SCANS 8  
 ACQTM 2.0500 sec  
 PD 4.9500 sec  
 PW1 5.80 usec  
 IRNUC 1H  
 CTEMP 24.2 c  
 SLVNT CDCL3  
 EXREF 0.00 ppm  
 BF 0.12 Hz  
 RGAIN 18

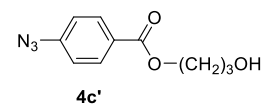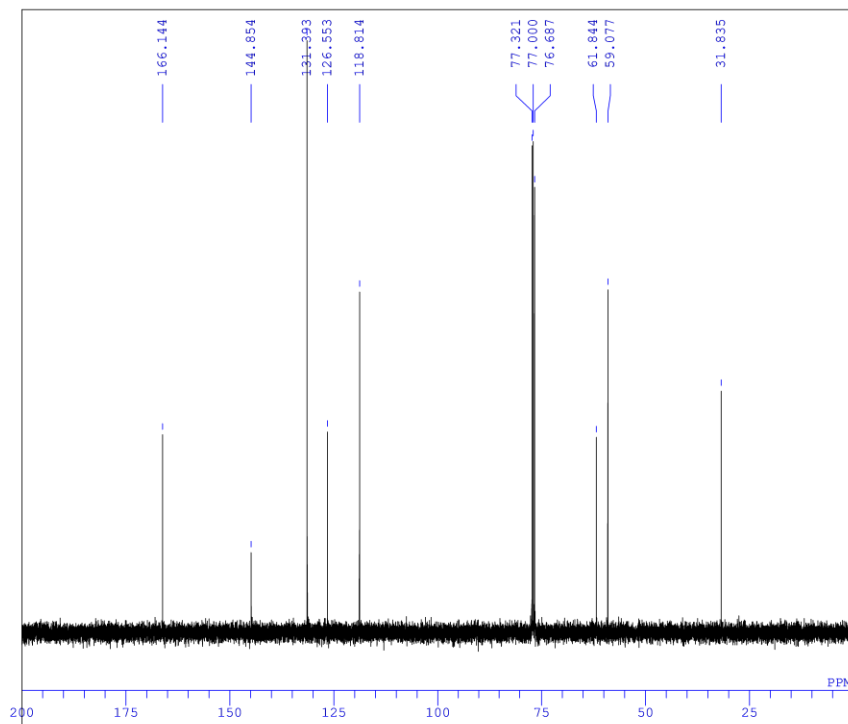

DFILE 4-N3C6H4CO2 (CH2) 3OH  
 COMNT Thu May 30 12:37:19  
 DATIM 13C  
 EXMOD BCM  
 OBFREQ 100.40 MHz  
 OBSET 125.00 KHz  
 OBFIN 10500.00 Hz  
 POINT 32768  
 FREQU 27118.64 Hz  
 SCANS 256  
 ACQTM 1.2083 sec  
 PD 1.7920 sec  
 PW1 5.80 usec  
 IRNUC 1H  
 CTEMP 24.4 c  
 SLVNT CDCL3  
 EXREF 77.00 ppm  
 BF 0.09 Hz  
 RGAIN 25

### 3-(*p*-Methoxybenzyloxy)propyl 4-Azidobenzoate (**4c**)

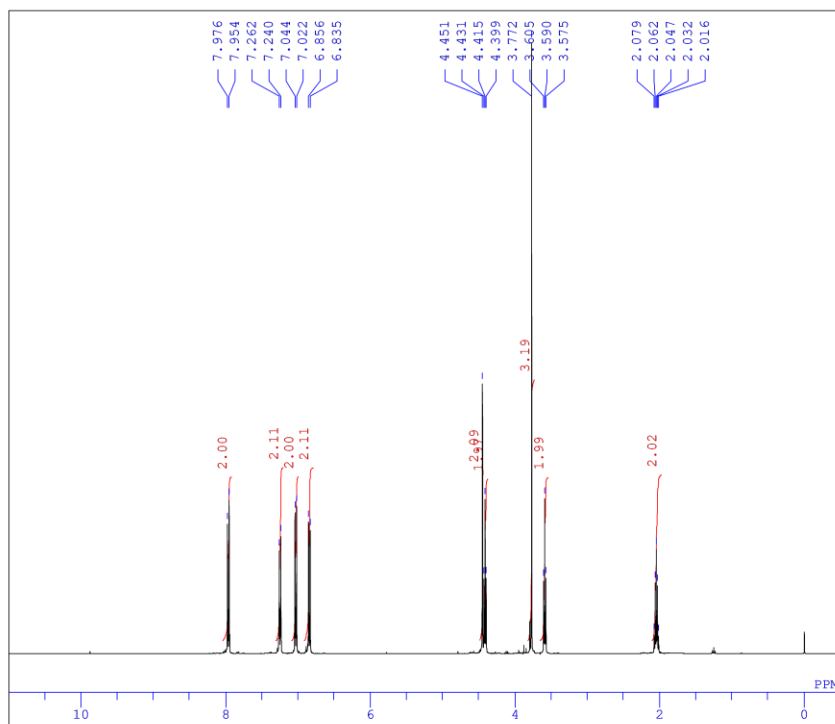

DFILE 4-N3C6H4CO2 (CH2) 3OF  
 COMNT single\_pulse  
 DATIM 2019-05-23 12:54:47  
 OBNUC 1H  
 EXMOD single\_pulse.jxp  
 OBFRQ 399.78 MHz  
 OBSET 4.19 KHz  
 OBFIN 7.29 Hz  
 POINT 26214  
 FREQU 6002.40 Hz  
 SCANS 8  
 ACQTM 4.3673 sec  
 PD 5.0000 sec  
 PW1 3.35 usec  
 IRNUC 1H  
 CTEMP 21.5 c  
 SLVNT CDCL3  
 EXREF 0.00 ppm  
 BF 0.21 Hz  
 RGAIN 24

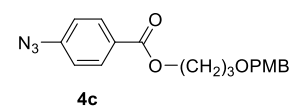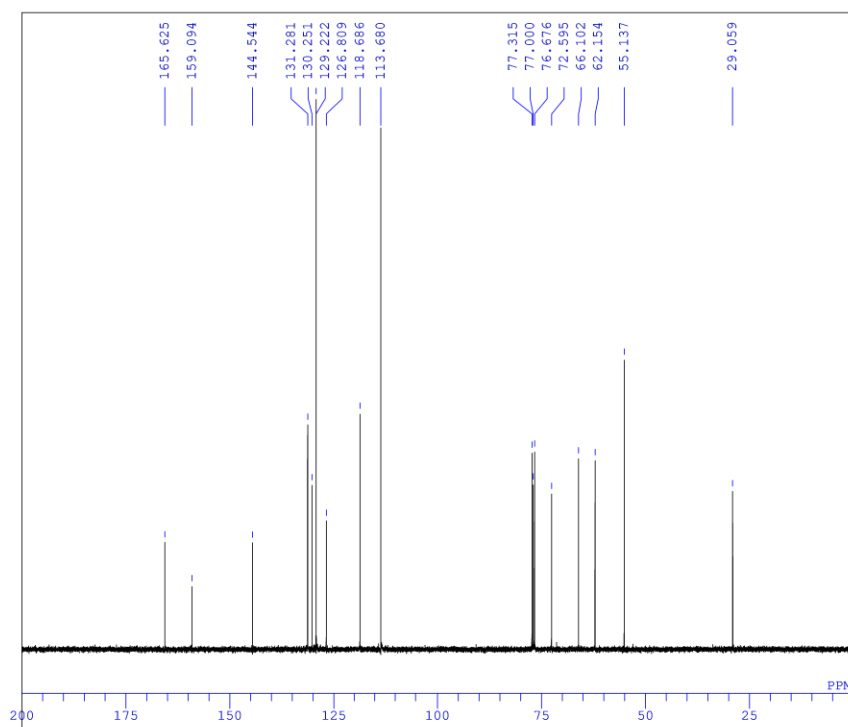

DFILE 4-N3C6H4CO2 (CH2) 3OF  
 COMNT single\_pulse\_decoup  
 DATIM 2019-05-23 12:56:38  
 OBNUC 13C  
 EXMOD single\_pulse\_dec  
 OBFRQ 100.53 MHz  
 OBSET 5.35 KHz  
 OBFIN 5.86 Hz  
 POINT 26214  
 FREQU 25125.63 Hz  
 SCANS 256  
 ACQTM 1.0433 sec  
 PD 2.0000 sec  
 PW1 3.60 usec  
 IRNUC 1H  
 CTEMP 21.7 c  
 SLVNT CDCL3  
 EXREF 77.00 ppm  
 BF 0.21 Hz  
 RGAIN 60

# 2-tert-Butoxycarbonylamino-5-(2-methoxy-2-oxo-1-phenylethyl)phenylboronic Acid Pinacol Ester (1f')

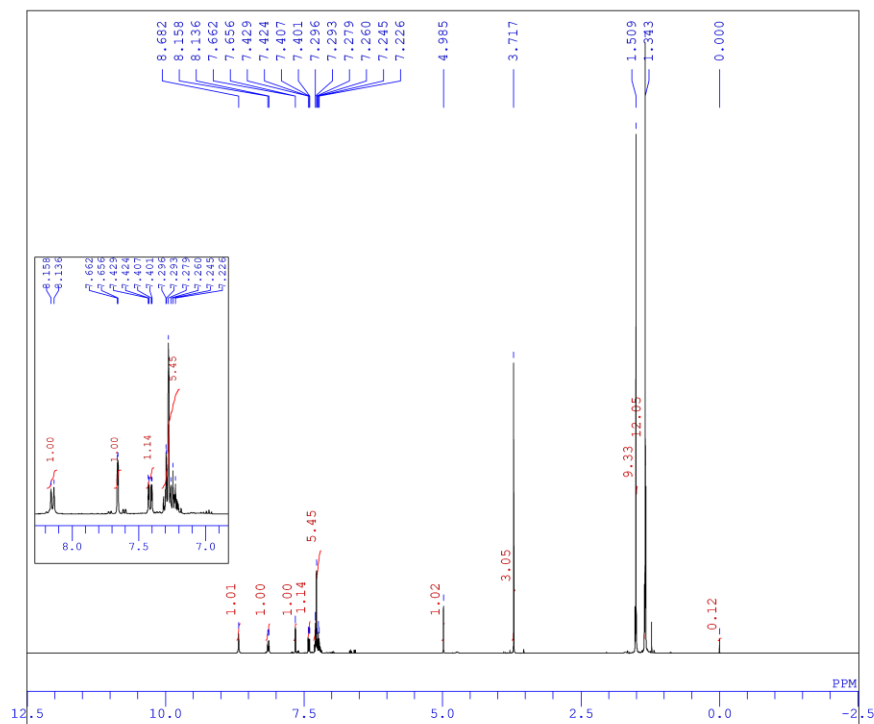

DFILE 2-pinBC6H4NHBoc+PhC  
 COMNT single\_pulse  
 DATIM 2019-05-23 11:37:28  
 OBNUC 1H  
 EXMOD single\_pulse.jxp  
 OBFREQ 399.78 MHz  
 OBSET 4.19 KHz  
 OBFIN 7.29 Hz  
 POINT 26214  
 FREQU 6002.40 Hz  
 SCANS 16  
 ACQTM 4.3673 sec  
 PD 5.0000 sec  
 PW1 3.35 usec  
 IRNUC 1H  
 CTEMP 21.1 c  
 SLVNT CDCL3  
 EXREF 0.00 ppm  
 BF 0.01 Hz  
 RGAIN 22

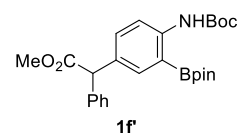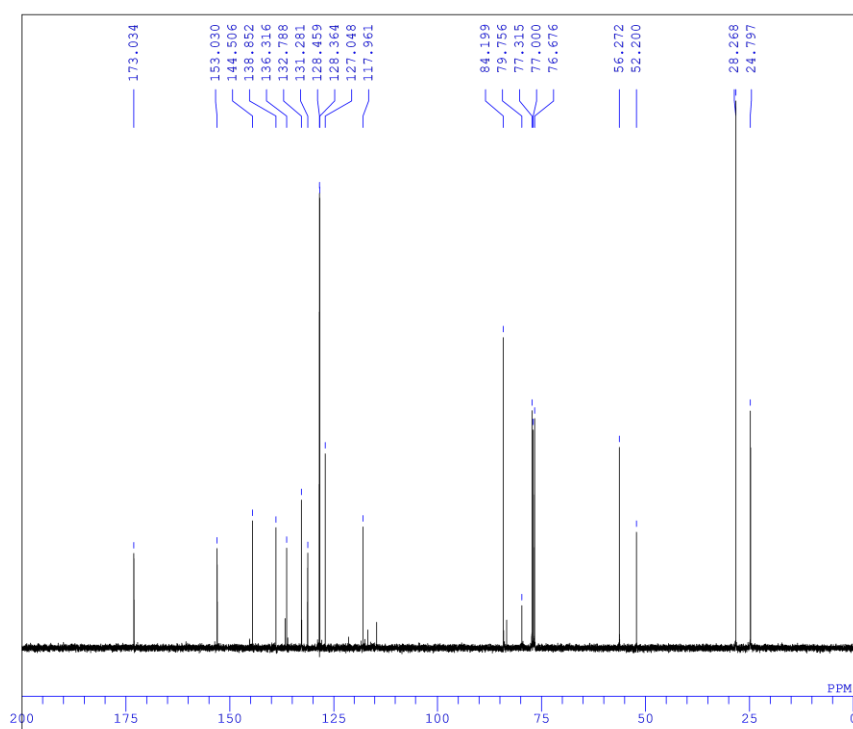

DFILE 2-pinBC6H4NHBoc+PhC  
 COMNT single\_pulse\_decoup  
 DATIM 2019-05-23 11:40:34  
 OBNUC 13C  
 EXMOD single\_pulse\_dec  
 OBFREQ 100.53 MHz  
 OBSET 5.35 KHz  
 OBFIN 5.86 Hz  
 POINT 26214  
 FREQU 25125.63 Hz  
 SCANS 256  
 ACQTM 1.0433 sec  
 PD 2.0000 sec  
 PW1 3.60 usec  
 IRNUC 1H  
 CTEMP 21.3 c  
 SLVNT CDCL3  
 EXREF 77.00 ppm  
 BF 0.21 Hz  
 RGAIN 60

## 2-Amino-5-(2-methoxy-2-oxo-1-phenylethyl)phenylboronic Acid Pinacol Ester (1f)

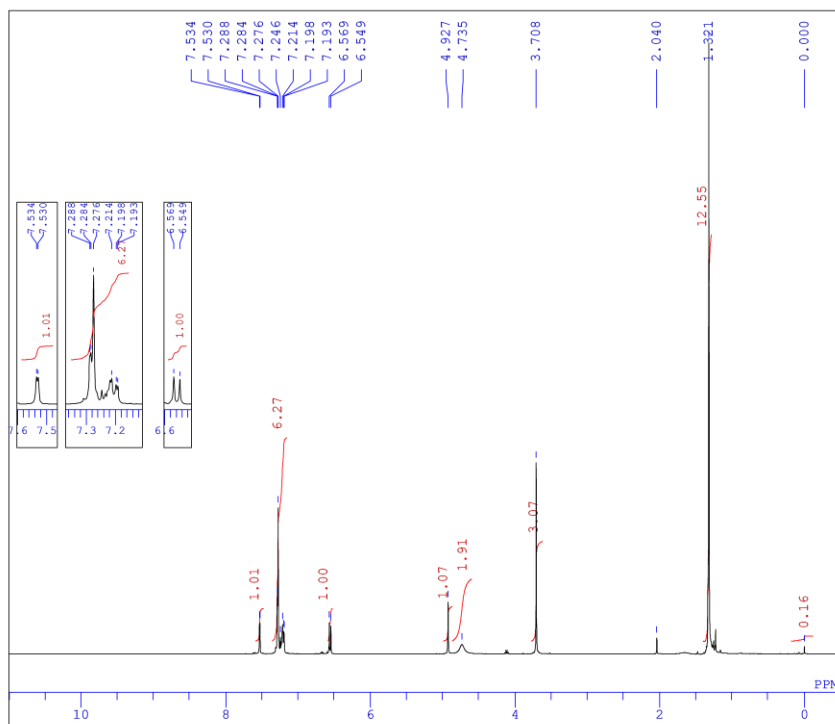

DFILE 4-H2N-3-pinBC6H3CH(  
 COMNT MK-27-DIBAH(Bn)-Fr7  
 DATIM Tue Aug 20 11:58:39  
 OBNUC 1H  
 EXMOD NON  
 OBFREQ 399.65 MHz  
 OBSET 124.00 KHz  
 OBFIN 10500.00 Hz  
 POINT 16384  
 FREQU 7992.01 Hz  
 SCANS 8  
 ACQTM 2.0500 sec  
 PD 4.9500 sec  
 PW1 6.20 usec  
 IRNUC 1H  
 CTEMP 23.6 c  
 SLVNT CDCL3  
 EXREF 0.00 ppm  
 BF 1.20 Hz  
 RGAIN 13

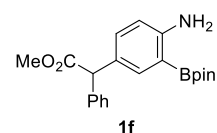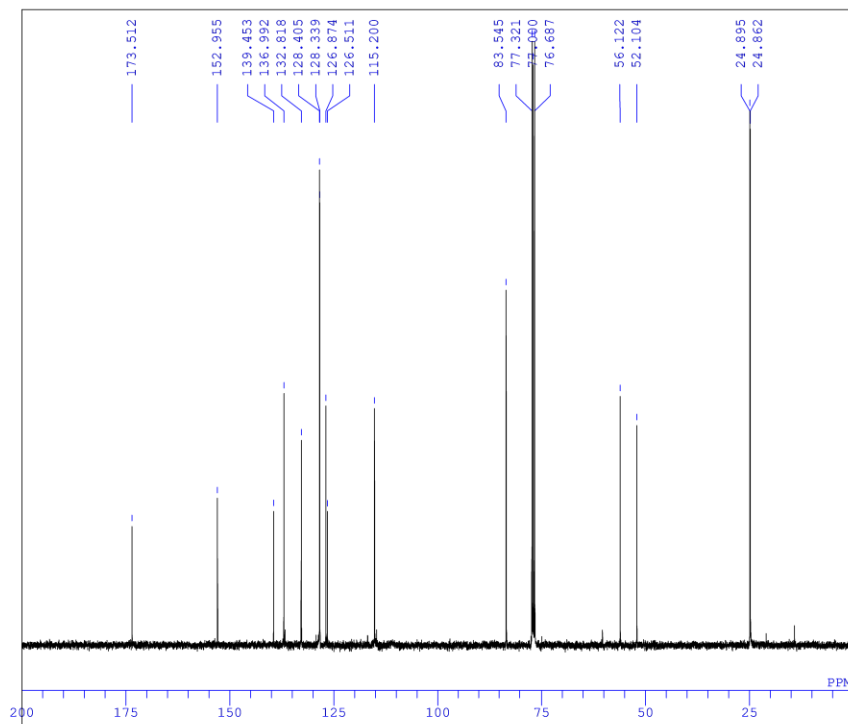

DFILE 4-H2N-3-pinBC6H3CH(  
 COMNT 4-H2N-3-pinBC6H3CH(  
 DATIM Tue Aug 20 12:55:26  
 OBNUC 13C  
 EXMOD BCM  
 OBFREQ 100.40 MHz  
 OBSET 125.00 KHz  
 OBFIN 10500.00 Hz  
 POINT 32768  
 FREQU 27118.64 Hz  
 SCANS 1024  
 ACQTM 1.2083 sec  
 PD 1.7920 sec  
 PW1 6.20 usec  
 IRNUC 1H  
 CTEMP 24.5 c  
 SLVNT CDCL3  
 EXREF 77.00 ppm  
 BF 1.20 Hz  
 RGAIN 25

## 2-Amino-4-(*tert*-butyldimethylsilyloxymethyl)phenylboronic Acid Pinacol Ester (1h)

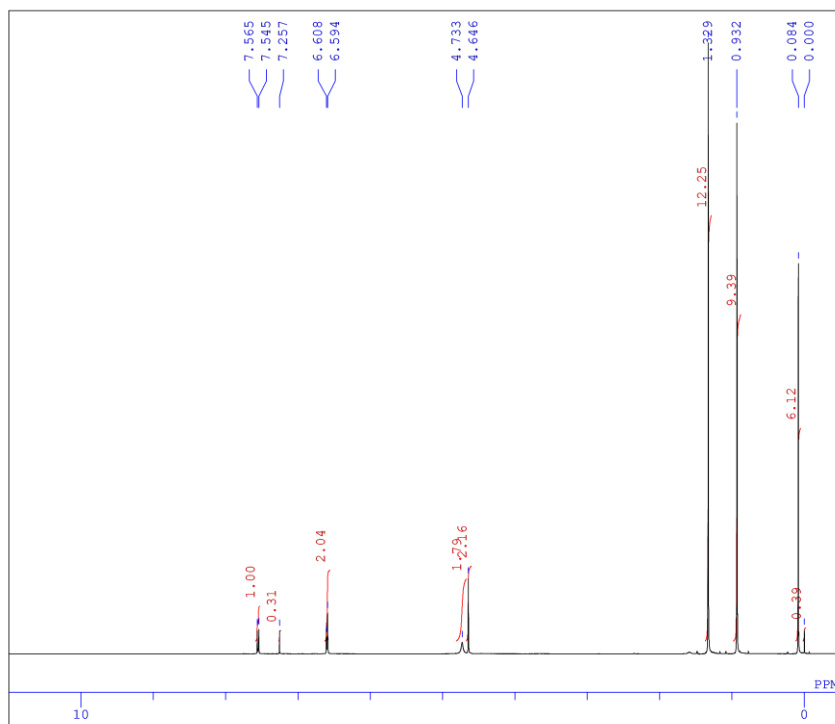

DFILE 2-H2N-4-TBSOCH2C6H3  
 COMNT single\_pulse  
 DATIM 2019-04-17 13:04:50  
 OBNUC 1H  
 EXMOD single\_pulse.jxp  
 OBFREQ 399.78 MHz  
 OBSET 4.19 KHz  
 OBFIN 7.29 Hz  
 POINT 26214  
 FREQU 6002.40 Hz  
 SCANS 8  
 ACQTM 4.3673 sec  
 PD 5.0000 sec  
 PW1 3.35 usec  
 IRNUC 1H  
 CTEMP 20.7 c  
 SLVNT CDCL3  
 EXREF 0.00 ppm  
 BF 0.12 Hz  
 RGAIN 30

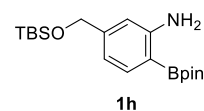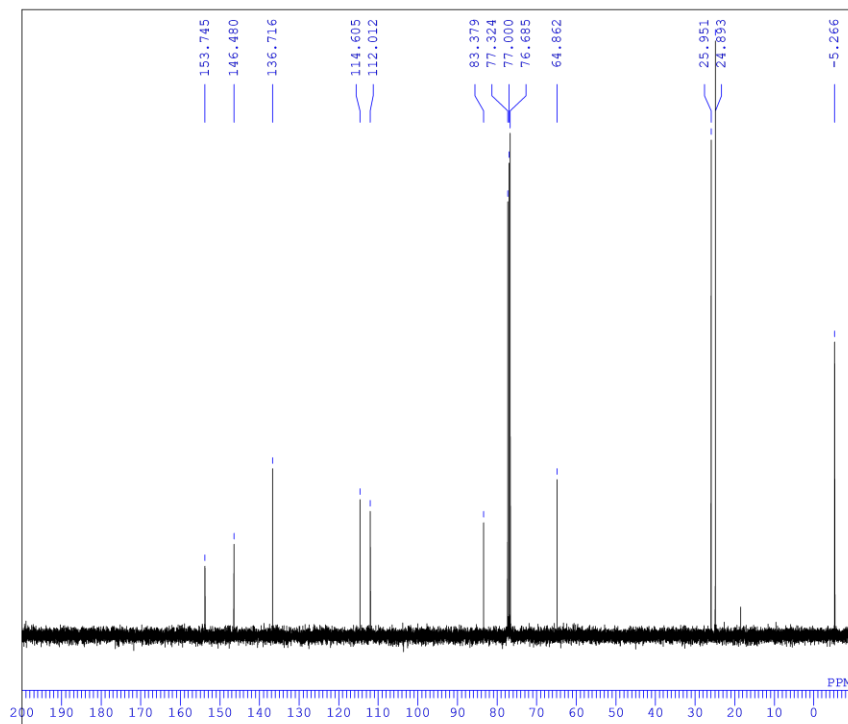

DFILE 2-H2N-4-TBSOCH2C6H3  
 COMNT single\_pulse\_decoup  
 DATIM 2019-04-17 13:06:41  
 OBNUC 13C  
 EXMOD single\_pulse\_dec  
 OBFREQ 100.53 MHz  
 OBSET 5.35 KHz  
 OBFIN 5.86 Hz  
 POINT 26214  
 FREQU 25125.63 Hz  
 SCANS 200  
 ACQTM 1.0433 sec  
 PD 2.0000 sec  
 PW1 3.60 usec  
 IRNUC 1H  
 CTEMP 20.7 c  
 SLVNT CDCL3  
 EXREF 77.00 ppm  
 BF 0.12 Hz  
 RGAIN 60

# 1-(4-Methoxycarbonylphenyl)-1,2,3-benzotriazol (5aa)

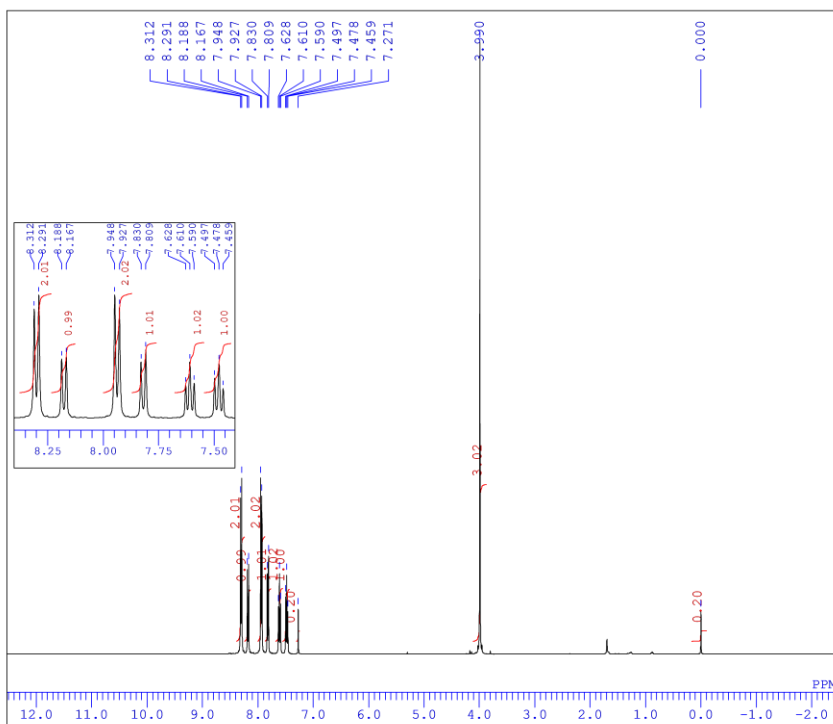

DFILE 1-(4-MeO2CC6H4)-Bt\_  
 COMNT single\_pulse  
 DATIM 2019-02-18 14:47:37  
 OBNUC 1H  
 EXMOD single\_pulse.jxp  
 OBFRQ 399.78 MHz  
 OBSET 4.19 KHz  
 OBFIN 7.29 Hz  
 POINT 26214  
 FREQU 6002.40 Hz  
 SCANS 16  
 ACQTM 4.3673 sec  
 PD 5.0000 sec  
 PW1 3.35 usec  
 IRNUC 1H  
 CTEMP 20.9 c  
 SLVNT CDCL3  
 EXREF 0.00 ppm  
 BF 1.20 Hz  
 RGAIN 40

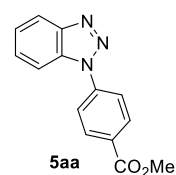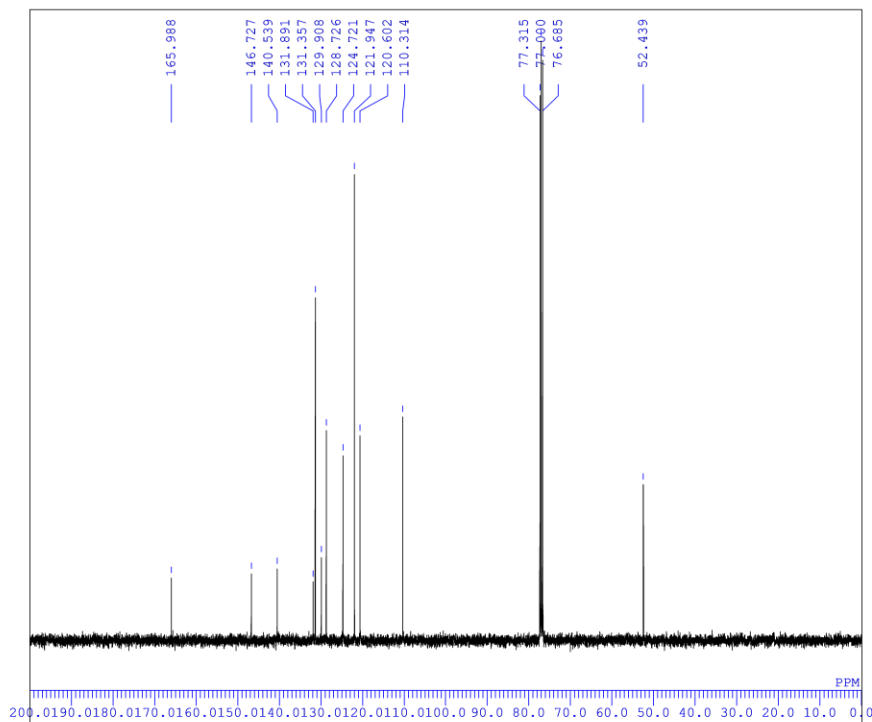

DFILE 1-(4-MeO2CC6H4)-Bt\_  
 COMNT single\_pulse\_decoupl  
 DATIM 2019-02-18 14:50:38  
 OBNUC 13C  
 EXMOD single\_pulse\_dec  
 OBFRQ 100.53 MHz  
 OBSET 5.35 KHz  
 OBFIN 5.86 Hz  
 POINT 26214  
 FREQU 25125.63 Hz  
 SCANS 256  
 ACQTM 1.0433 sec  
 PD 2.0000 sec  
 PW1 3.60 usec  
 IRNUC 1H  
 CTEMP 22.2 c  
 SLVNT CDCL3  
 EXREF 77.00 ppm  
 BF 1.20 Hz  
 RGAIN 60

### 3-(*tert*-Butyldimethylsilyloxy)propyl 4-(1*H*-Benzotriazol-1-yl)benzoate (**5ab**)

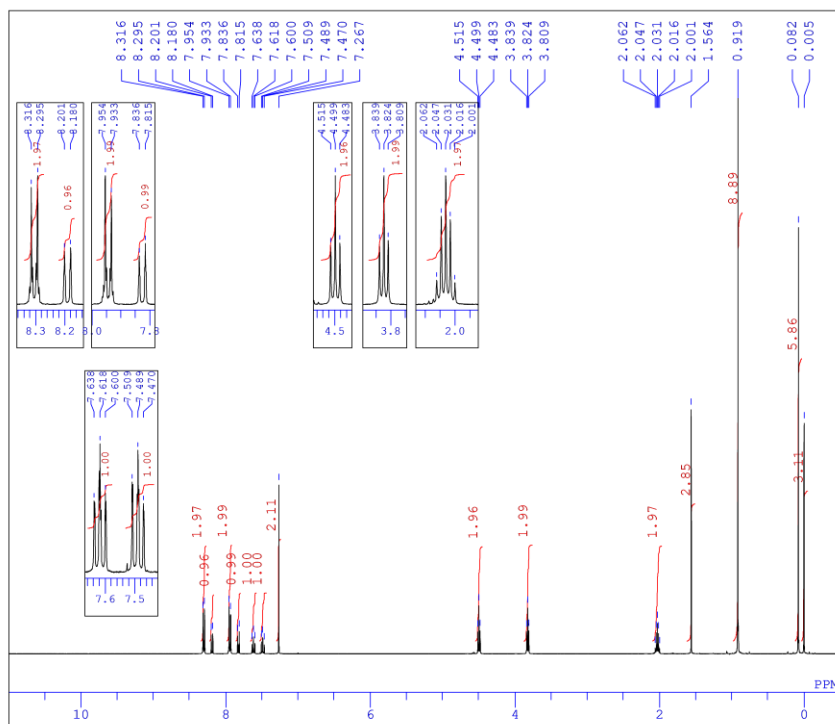

DFILE 190930 1-[4-TBSO(CH  
 COMNT single\_pulse  
 DATIM 2019-09-30 11:15:51  
 OBNUC 1H  
 EXMOD single\_pulse.jxp  
 OBFRQ 399.78 MHz  
 OBSET 4.19 KHz  
 OBFIN 7.29 Hz  
 POINT 26214  
 FREQU 6002.40 Hz  
 SCANS 16  
 ACQTM 4.3673 sec  
 PD 5.0000 sec  
 PW1 3.35 usec  
 IRNUC 1H  
 CTEMP 22.2 c  
 SLVNT CDCL3  
 EXREF 7.27 ppm  
 BF 0.12 Hz  
 RGAIN 48

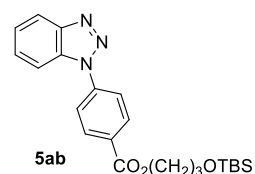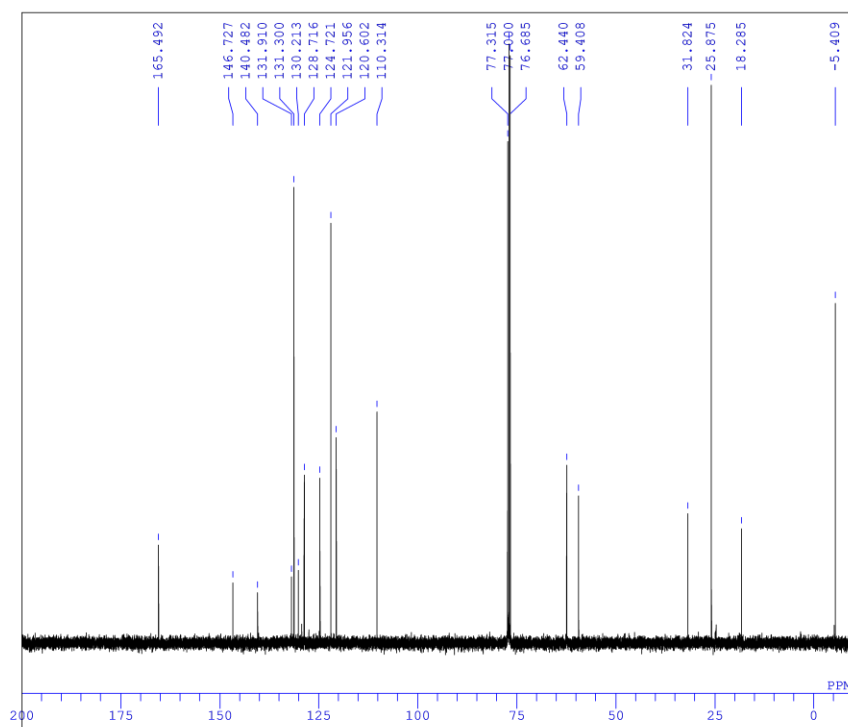

DFILE 1-(4-TBSOCH2CH2CH2C  
 COMNT single\_pulse\_decoup  
 DATIM 2018-12-26 09:32:40  
 OBNUC 13C  
 EXMOD single\_pulse\_dec  
 OBFRQ 100.53 MHz  
 OBSET 5.35 KHz  
 OBFIN 5.86 Hz  
 POINT 26214  
 FREQU 25125.63 Hz  
 SCANS 640  
 ACQTM 1.0433 sec  
 PD 2.0000 sec  
 PW1 3.60 usec  
 IRNUC 1H  
 CTEMP 21.5 c  
 SLVNT CDCL3  
 EXREF 77.00 ppm  
 BF 0.09 Hz  
 RGAIN 60

### 3-(*p*-Methoxybenzyloxy)propyl 4-(1*H*-Benzotriazol-1-yl)benzoate (**5ac**)

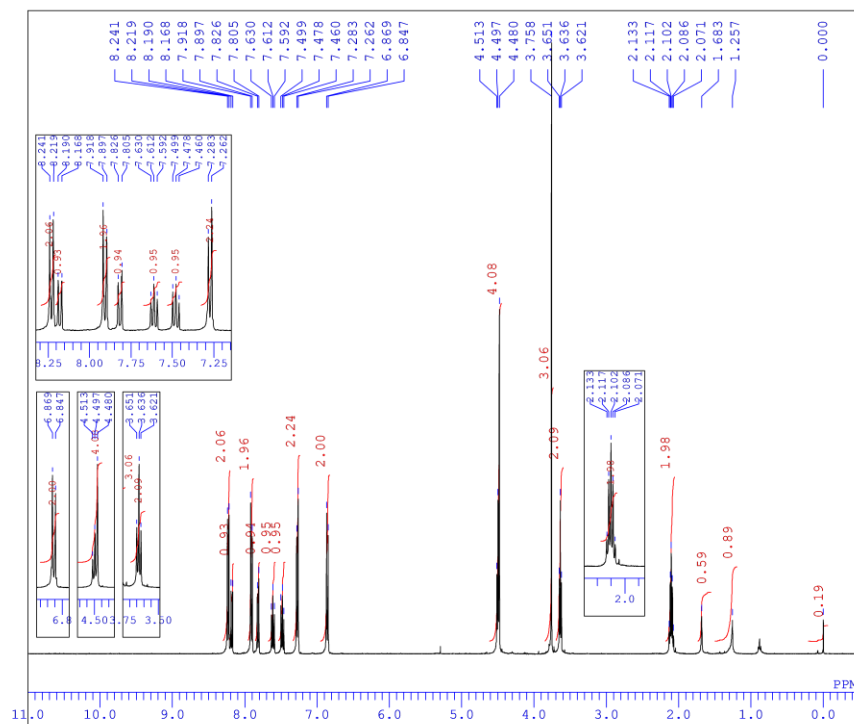

DFILE 1-(4-PMBO (CH<sub>2</sub>)<sub>3</sub>O)2CC  
 COMNT Thu May 30 11:12:32  
 DATIM 1H  
 OBNUC NON  
 EXMOD 399.65 MHz  
 OBFRQ 124.00 KHz  
 OBSET 10500.00 Hz  
 OBFIN 16384  
 POINT 7992.01 Hz  
 FREQU 8  
 SCANS 2.0500 sec  
 ACQTM 4.9500 sec  
 PD 5.80 usec  
 PW1 1H  
 IRNUC 25.0 c  
 CTEMP CDCL3  
 SLVNT 0.00 ppm  
 EXREF 0.12 Hz  
 BF 19  
 RGAIN

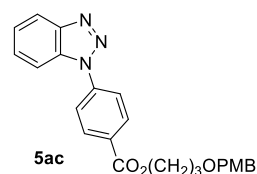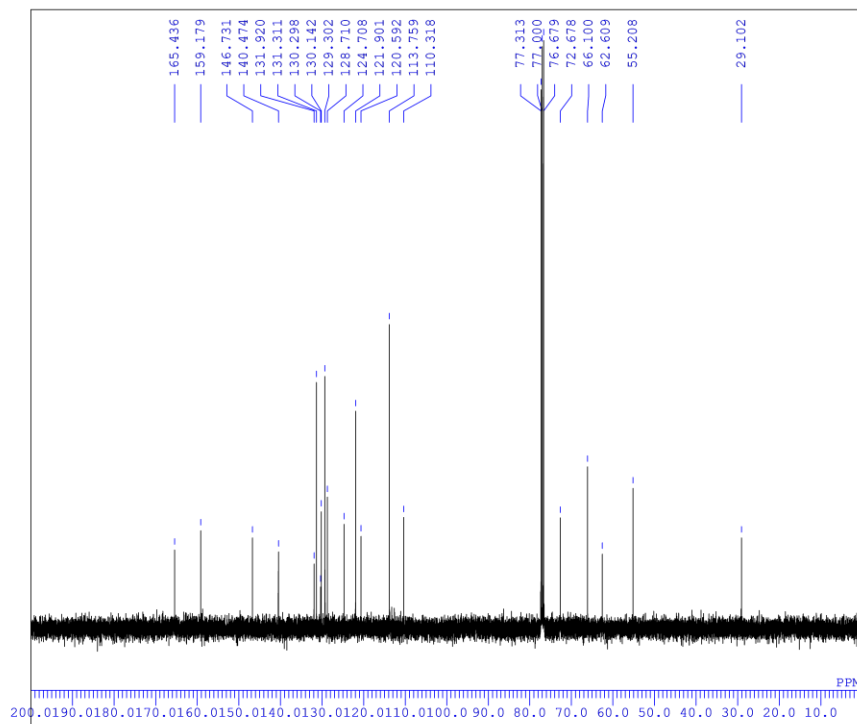

DFILE 1-(4-PMBO (CH<sub>2</sub>)<sub>3</sub>O)2CC  
 COMNT Thu May 30 11:28:00  
 DATIM 13C  
 OBNUC BCM  
 EXMOD 100.40 MHz  
 OBFRQ 125.00 KHz  
 OBSET 10500.00 Hz  
 OBFIN 32768  
 POINT 27118.64 Hz  
 FREQU 256  
 SCANS 1.2083 sec  
 ACQTM 1.7920 sec  
 PD 5.80 usec  
 PW1 1H  
 IRNUC 24.8 c  
 CTEMP CDCL3  
 SLVNT 77.00 ppm  
 EXREF 0.12 Hz  
 BF 25  
 RGAIN



**2-(1*H*-Benzotriazol-1-yl)ethyl 2,3,4,6-Tetra-*O*-acetyl- $\beta$ -D-glucopyranoside (5ag)**

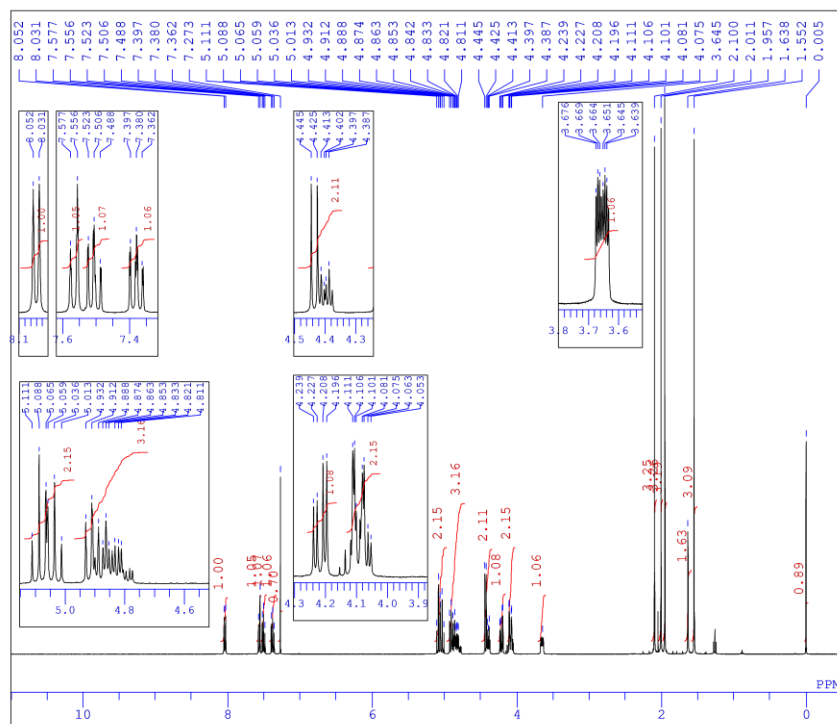

```

DFTILE 190930G1c-benzene_
COMMT  single pulse
DATIM  2019-09-30 11:23:02
OBNUC  1H
EXMOD  single pulse.jxp
OBFREQ 399.78 MHz
OBSET  4.19 KHz
OBFIN  7.29 Hz
POINT  26214
FREQU  6002.40 Hz
SCANS  16
AQCTM  4.3673 sec
PD      5.0000 sec
PWL     3.35 usec
IRNUC  1H
CTEMP  22.4 c
SLVNT  CDCl3
EXREF  7.27 ppm
BF      0.09 Hz
RGAIN  42

```

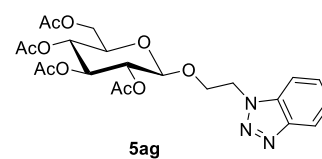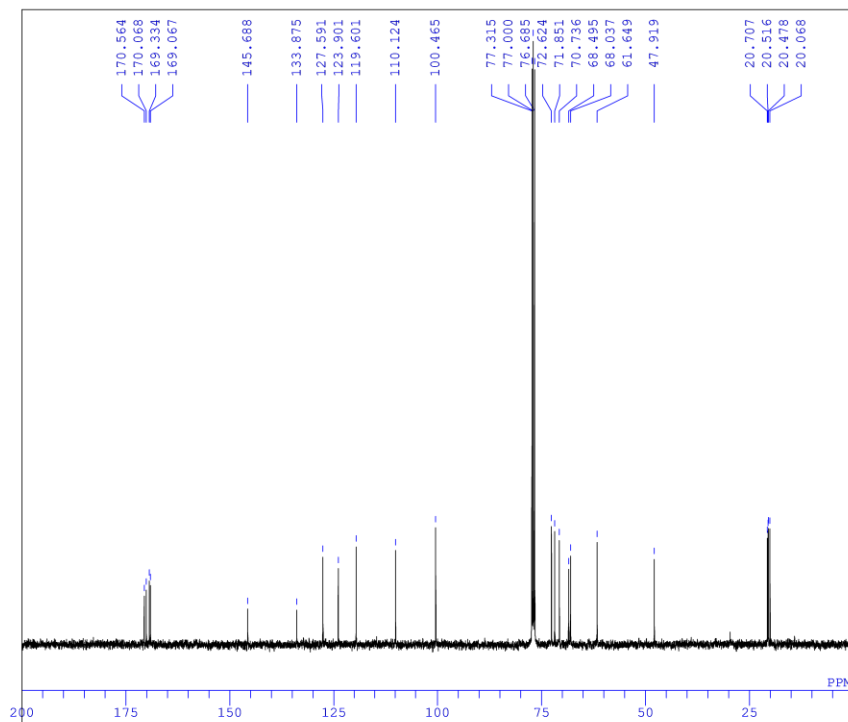

|       |                       |
|-------|-----------------------|
| DFILE | Glc+benzynes_E13c-dec |
| COMMT | single pulse decoupl  |
| DATIM | 2019-02-22 12:21:04   |
| OBNUC | 13C                   |
| EXMOD | single_pulse_dec      |
| OBFRQ | 100.53 MHz            |
| OBSET | 5.35 KHz              |
| OBFIN | 5.86 Hz               |
| POINT | 26214                 |
| FRQUQ | 25125.63 Hz           |
| SCANS | 512                   |
| ACQTM | 1.0433 sec            |
| PD    | 2.0000 sec            |
| FW1   | 3.60 usec             |
| IRNUC | 1H                    |
| CTEMP | 22.8 c                |
| SLVNT | CDCL3                 |
| EXREF | 77.00 ppm             |
| BF    | 2.00 Hz               |
| RGAIN | 60                    |

# **3'-(1*H*-Benzotriazol-1-yl)-5'-*O*-*tert*-butyldimethylsilyl-3'-deoxythymidine (5ah)**

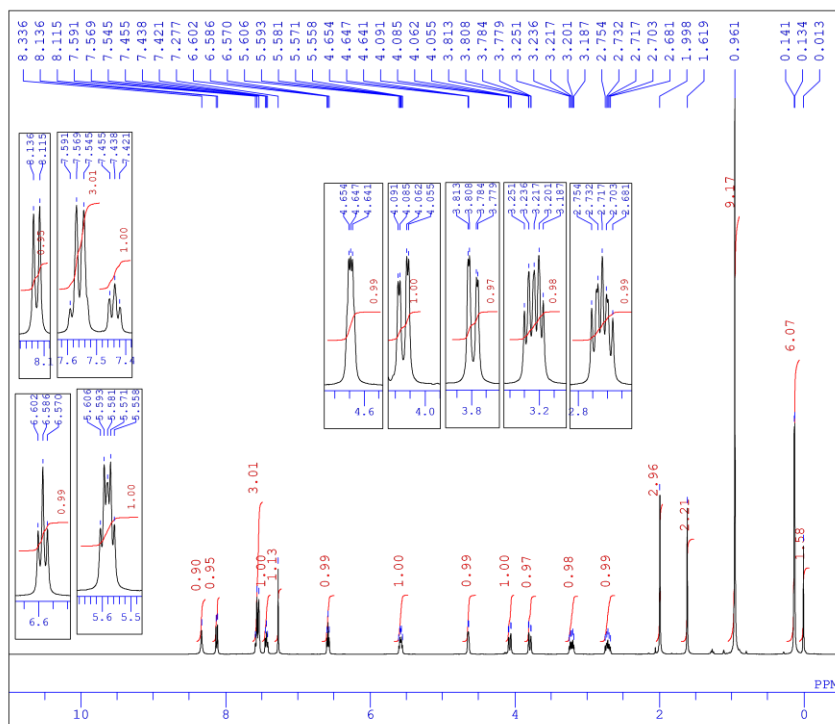

DFILE 190930AZT+benzyne\_  
 COMNT single\_pulse  
 DATIM 2019-09-30 11:32:23  
 OBNUC 1H  
 EXMOD single\_pulse.jxp  
 OBFREQ 399.78 MHz  
 OBSET 4.19 KHz  
 OBFIN 7.29 Hz  
 POINT 26214  
 FREQU 6002.40 Hz  
 SCANS 16  
 ACQTM 4.3673 sec  
 PD 5.0000 sec  
 PW1 3.35 usec  
 IRNUC 1H  
 CTEMP 22.5 c  
 SLVNT CDCL3  
 EXREF 7.27 ppm  
 BF 2.00 Hz  
 RGAIN 44

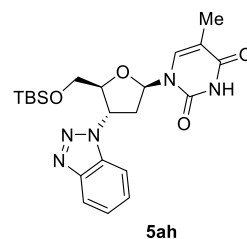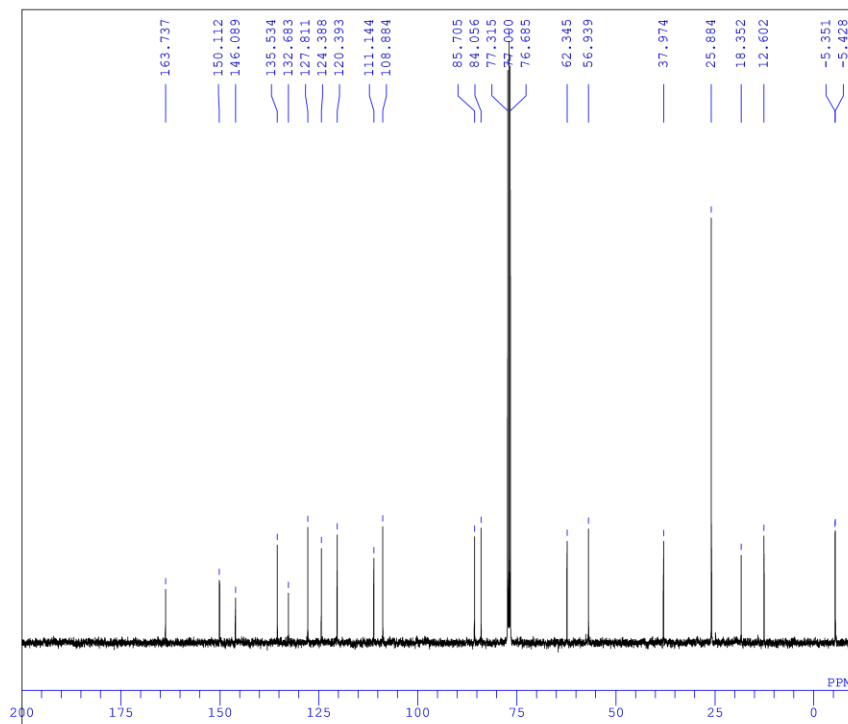

DFILE AZT+benzyne\_E13C-1-  
 COMNT single\_pulse\_decoup  
 DATIM 2019-02-22 11:19:26  
 OBNUC 13C  
 EXMOD single\_pulse\_dec  
 OBFREQ 100.53 MHz  
 OBSET 5.35 KHz  
 OBFIN 5.86 Hz  
 POINT 26214  
 FREQU 25125.63 Hz  
 SCANS 512  
 ACQTM 1.0433 sec  
 PD 2.0000 sec  
 PW1 3.60 usec  
 IRNUC 1H  
 CTEMP 20.9 c  
 SLVNT CDCL3  
 EXREF 77.00 ppm  
 BF 2.00 Hz  
 RGAIN 60

**5-Bromo-1-(4-Methoxycarbonylphenyl)-1,2,3-benzotriazol**  
**Methoxycarbonylphenyl)-1,2,3-benzotriazol (5ea)**

**and 6-Bromo-1-(4-**

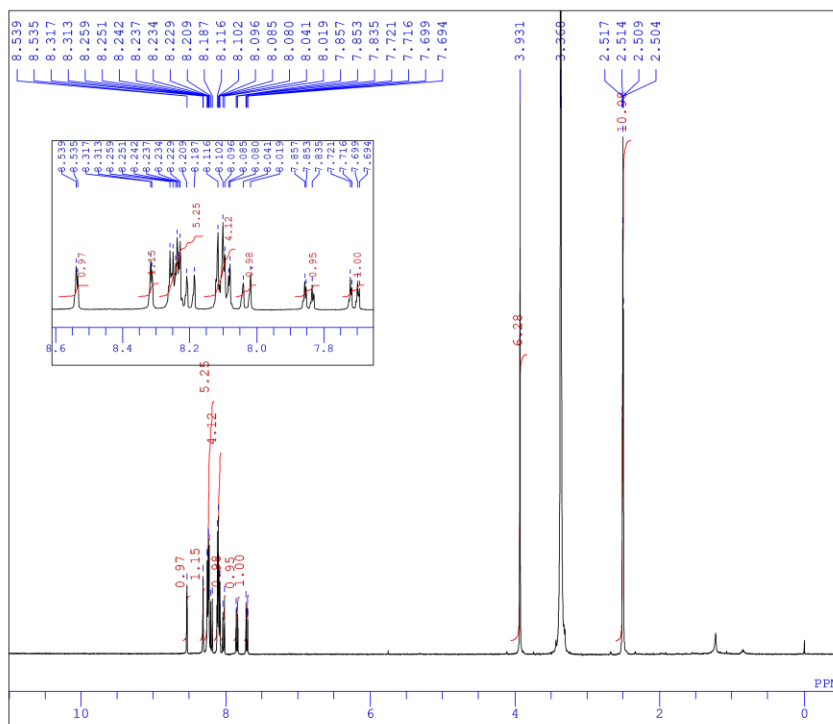

DFILE Br-benzyne+4-MeO2CC  
 COMNT auto  
 DATIM Tue May 28 16:13:18  
 OBNUC 1H  
 EXMOD NON  
 OBFRQ 399.65 MHz  
 OBSET 124.00 KHz  
 OBFIN 10500.00 Hz  
 POINT 16384  
 FREQU 7992.01 Hz  
 SCANS 64  
 ACQTM 2.0500 sec  
 PD 4.9500 sec  
 PW1 5.80 usec  
 IRNUC 1H  
 CTEMP 24.2 c  
 SLVNT DMSO  
 EXREF 0.00 ppm  
 BF 0.01 Hz  
 RGAIN 18

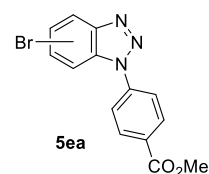

**Methyl 4-[5-(2-Methoxy-2-oxo-1-phenylethyl)-1*H*-benzotriazol-1-yl]benzoate and  
Methyl 4-[6-(2-Methoxy-2-oxo-1-phenylethyl)-1*H*-benzotriazol-1-yl]benzoate (5fa)**

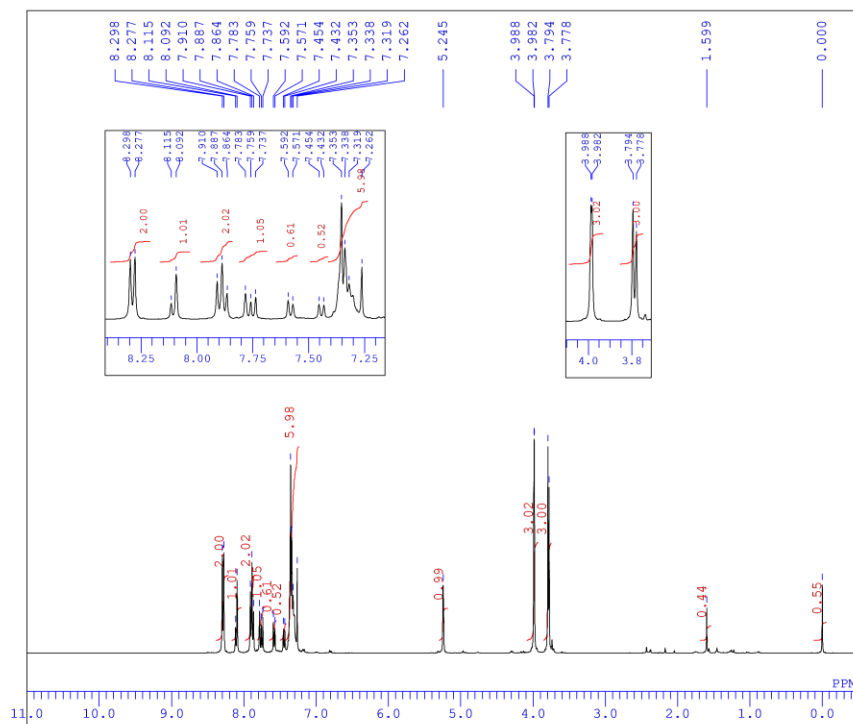

DFILE MeO2CCH(Ph)-benzyne  
 COMNT single\_pulse  
 DATIM 2019-02-18 14:39:07  
 OBNUC 1H  
 EXMOD single\_pulse.jxp  
 OBFRQ 399.78 MHz  
 OBSET 4.19 KHz  
 OBFIN 7.29 Hz  
 POINT 26214  
 FREQU 6002.40 Hz  
 SCANS 16  
 ACQTM 4.3673 sec  
 PD 5.0000 sec  
 PW1 3.35 usec  
 IRNUC 1H  
 CTMP 21.5 c  
 SLVNT CDCL3  
 EXREF 0.00 ppm  
 BF 1.20 Hz  
 RGAIN 44

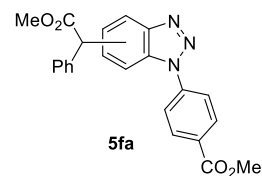

**Methyl 1-(4-Methoxycarbonylphenyl)-1,2,3-benzotriazole-5-carboxylate and Methyl 1-(4-Methoxycarbonylphenyl)-1,2,3-benzotriazole-6-carboxylate (5ga)**

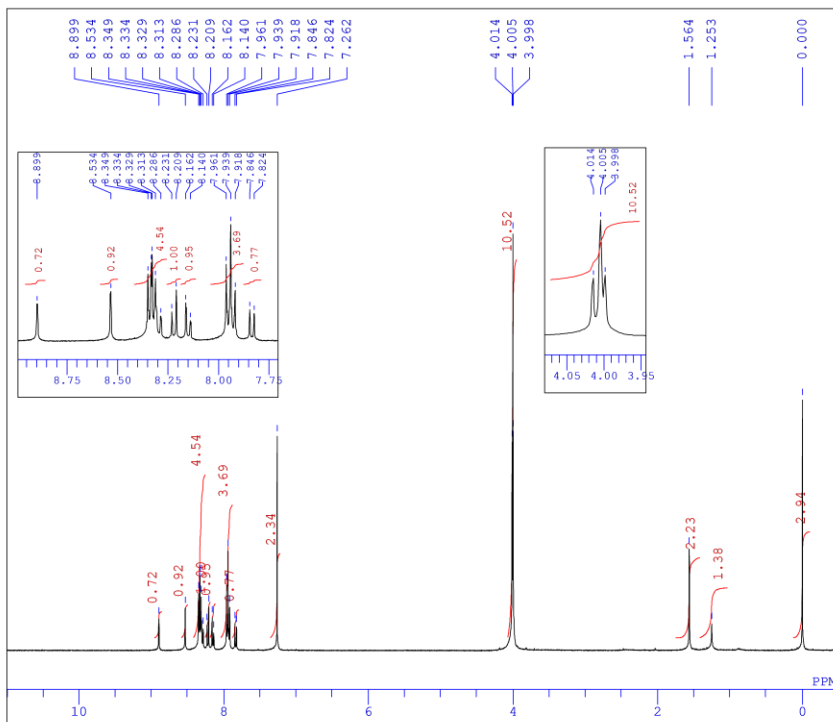

DFILE MeO2C-Benzzyne+4-MeC  
 COMNT auto  
 DATIM Tue May 28 15:57:06  
 OBNUC 1H  
 EXMOD NON  
 OBFRQ 399.65 MHz  
 OBSET 124.00 KHz  
 OBFIN 10500.00 Hz  
 POINT 16384  
 FREQU 7992.01 Hz  
 SCANS 64  
 ACQTM 2.0500 sec  
 PD 4.9500 sec  
 PW1 5.80 usec  
 IRNUC 1H  
 CTMP 24.5 c  
 SLVNT CDCL3  
 EXREF 0.00 ppm  
 BF 0.09 Hz  
 RGAIN 25

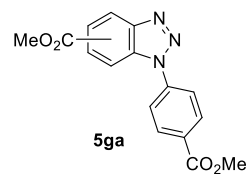

**5-(*tert*-Butyldimethylsilyloxymethyl)-1-(4-methoxycarbonylphenyl)-1,2,3-benzotriazol  
and 6-(*tert*-Butyldimethylsilyloxymethyl)-1-(4-Methoxycarbonylphenyl)-1,2,3-  
benzotriazol (5ha)**

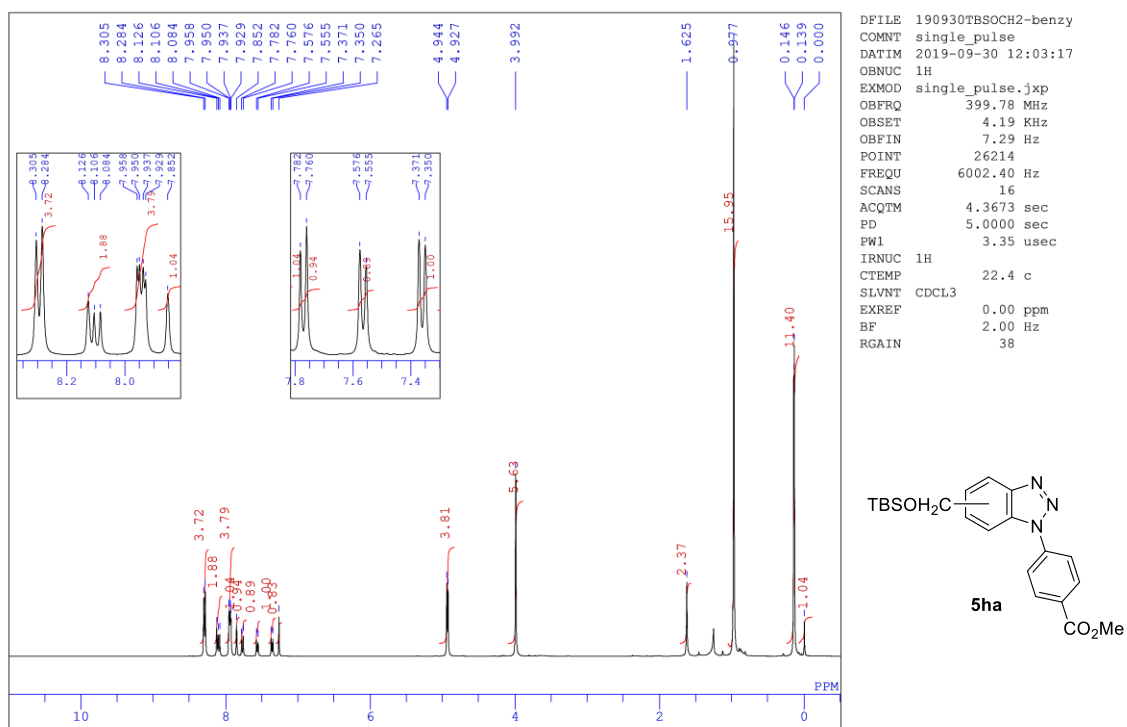

# 4-(Trimethylsilyloxy)naphthalene-1-ol (6c')

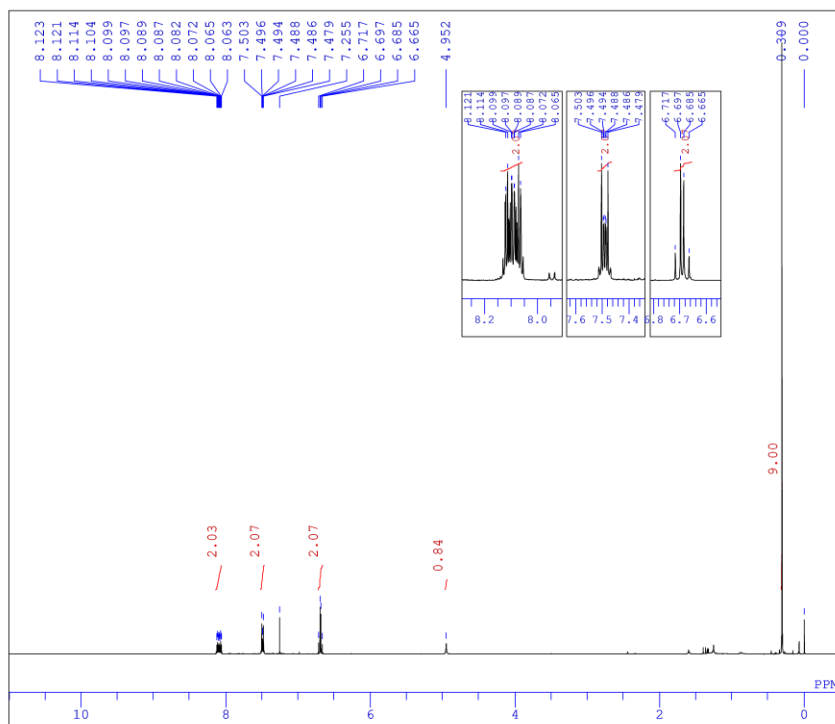

DFILE AT-603\_E1H-1-1 FT.a  
 COMNT single\_pulse  
 DATIM 2018-01-15 12:08:08  
 OBNUC 1H  
 EXMOD single\_pulse.jxp  
 OBFRQ 399.78 MHz  
 OBSET 4.19 KHz  
 OBFIN 7.29 Hz  
 POINT 26214  
 FREQU 6002.40 Hz  
 SCANS 8  
 ACQTM 4.3673 sec  
 PD 2.0000 sec  
 PW1 3.05 usec  
 IRNUC 1H  
 CTEMP 22.9 c  
 SLVNT CDCL3  
 EXREF 0.00 ppm  
 BF 0.12 Hz  
 RGAIN 40

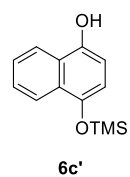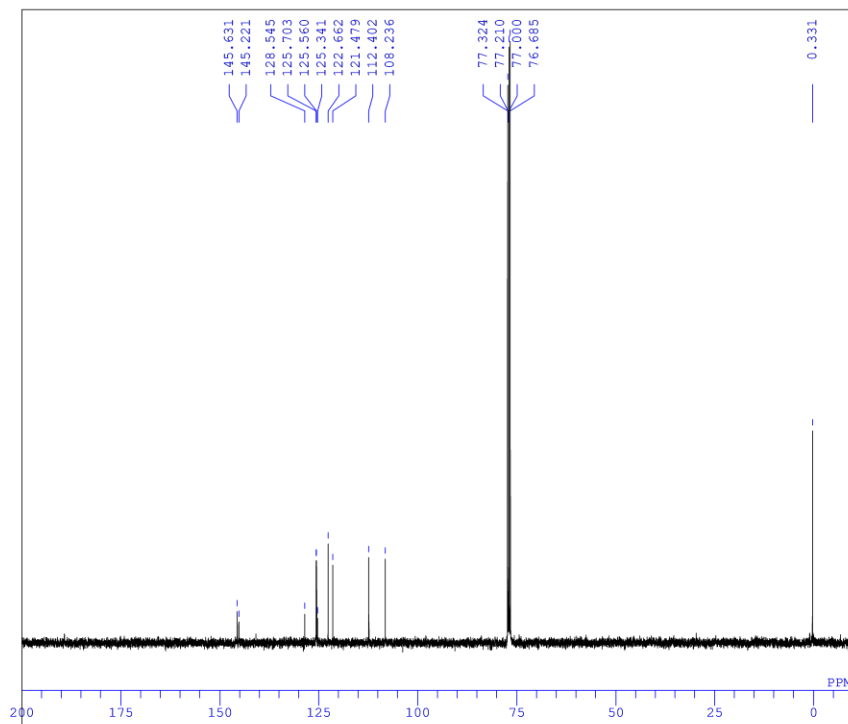

DFILE AT-603\_E13C-1-1 FT2  
 COMNT single\_pulse\_decoup  
 DATIM 2018-01-15 12:10:01  
 OBNUC 13C  
 EXMOD single\_pulse\_dec  
 OBFRQ 100.53 MHz  
 OBSET 5.35 KHz  
 OBFIN 5.86 Hz  
 POINT 26214  
 FREQU 25125.63 Hz  
 SCANS 600  
 ACQTM 1.0433 sec  
 PD 1.7000 sec  
 PW1 3.53 usec  
 IRNUC 1H  
 CTEMP 23.0 c  
 SLVNT CDCL3  
 EXREF 77.00 ppm  
 BF 1.20 Hz  
 RGAIN 60

**2-[1-(benzylcarbonyloxy)-2-(2,2,2-trichlorocarbonyloxy)hydrazineyl]-5-methoxyphenylboronic acid pinacol ester (8a)**

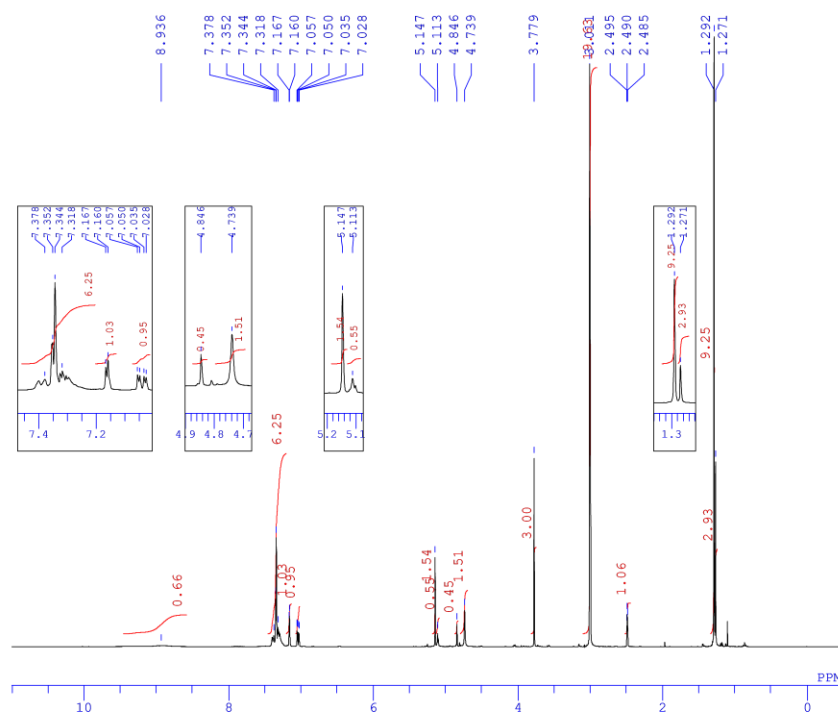

DFILE 4-MeO-2-pinBC6H3N(C)  
 COMNT single\_pulse  
 DATIM 2019-07-17 11:21:48  
 OBNUC 1H  
 EXMOD single\_pulse.jxp  
 OBFRQ 399.78 MHz  
 OBSET 4.19 KHz  
 OBFIN 7.29 Hz  
 POINT 26214  
 FREQU 6002.40 Hz  
 SCANS 16  
 ACQTM 4.3673 sec  
 PD 5.0000 sec  
 PW1 3.35 usec  
 IRNUC 1H  
 CTEMP 100.0 c  
 SLVNT DMSO  
 EXREF 2.49 ppm  
 BF 0.01 Hz  
 RGAIN 34

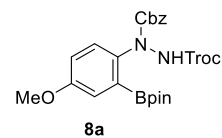



## 2-[1-(benzylcarbonyloxy)hydrazineyl]-5-methoxyphenylboronic acid pinacol ester (8b)

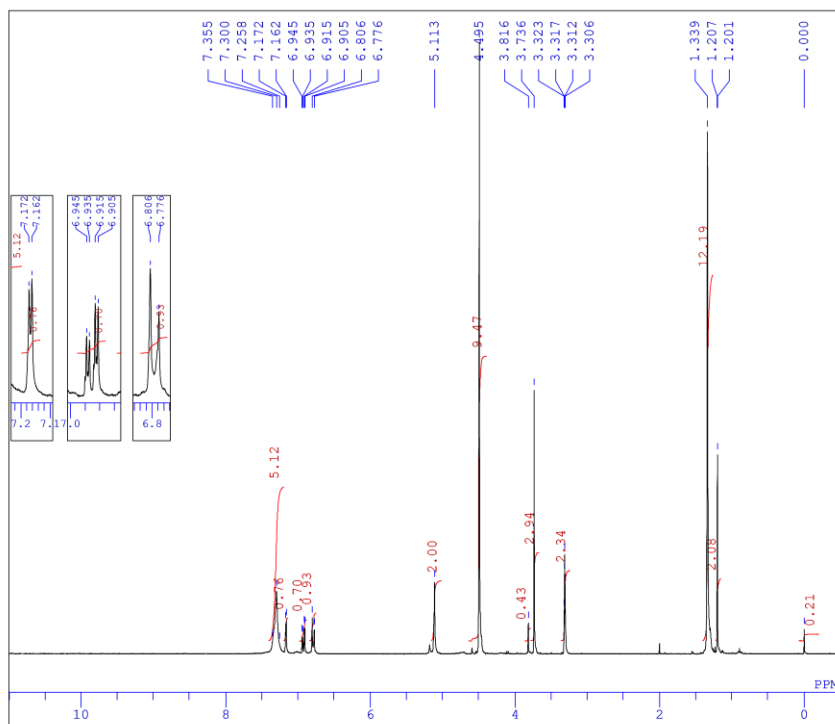

DFILE 190718 CD3OD.als pr  
 COMNT 190718 CD3OD  
 DATIM Thu Jul 18 14:56:06  
 OBNUC 1H  
 EXMOD NON  
 OBFRQ 300.40 MHz  
 OBSET 130.00 KHz  
 OBFIN 1150.00 Hz  
 POINT 32768  
 FREQU 6006.01 Hz  
 SCANS 16  
 ACQTM 5.4559 sec  
 PD 1.5440 sec  
 PW1 5.20 usec  
 IRNUC 1H  
 CTEMP 60.2 c  
 SLVNT CD3OD  
 EXREF 0.00 ppm  
 BF 0.09 Hz  
 RGAIN 17

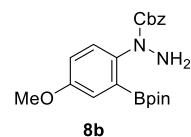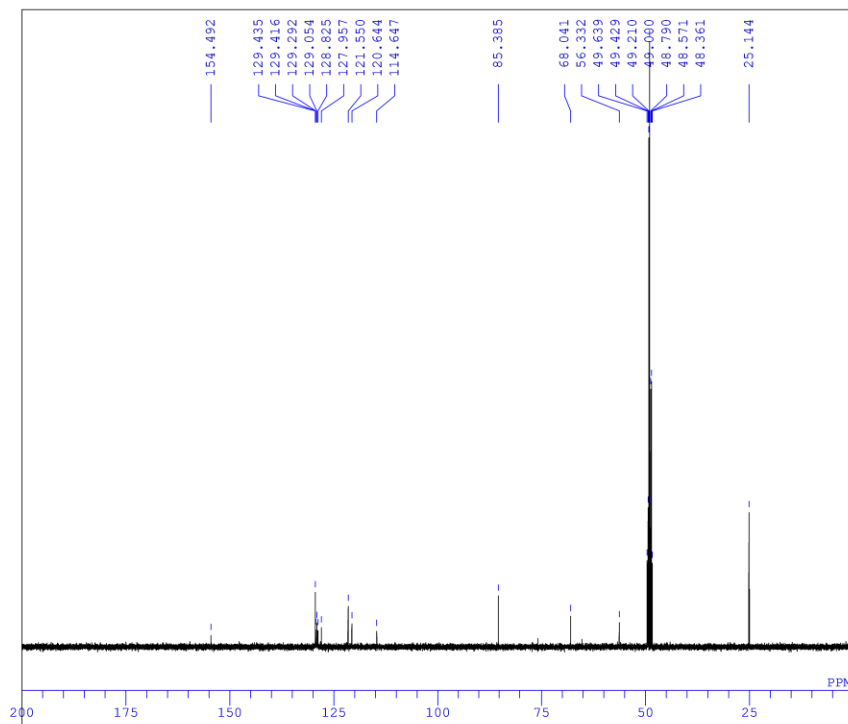

DFILE 4-MeO-2-pinBC6H3N\_C  
 COMNT single pulse decoupl  
 DATIM 2019-07-19 09:51:24  
 OBNUC 13C  
 EXMOD single\_pulse\_dec  
 OBFRQ 100.53 MHz  
 OBSET 5.35 KHz  
 OBFIN 5.86 Hz  
 POINT 26214  
 FREQU 25125.63 Hz  
 SCANS 1000  
 ACQTM 1.0433 sec  
 PD 2.0000 sec  
 PW1 3.60 usec  
 IRNUC 1H  
 CTEMP 60.0 c  
 SLVNT CD3OD  
 EXREF 49.00 ppm  
 BF 0.01 Hz  
 RGAIN 60

## 2-(2-tosylhydrazineyl)-5-methoxyphenylboronic acid pinacol ester (8c)

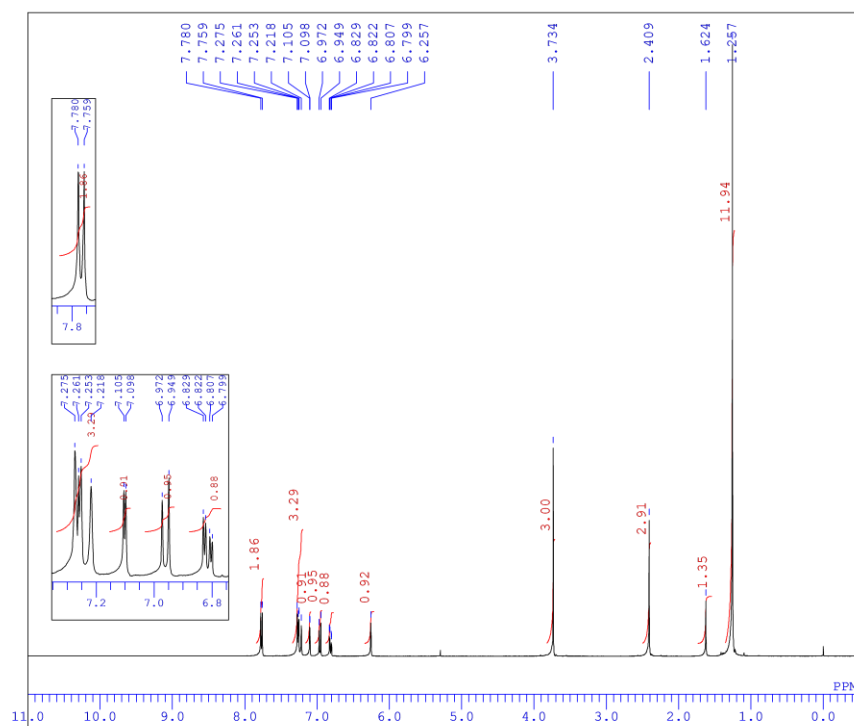

DFILE 4-MeO-2-pinBC6H3NHN  
 COMNT 4-MeO-2-pinBC6H3NHN  
 DATIM Sat Jul 20 14:35:28  
 OBNUC 1H  
 EXMOD NON  
 OBFREQ 399.65 MHz  
 OBSET 124.00 KHz  
 OBFIN 10500.00 Hz  
 POINT 16384  
 FREQU 7992.01 Hz  
 SCANS 8  
 ACQTM 2.0500 sec  
 PD 4.9500 sec  
 PW1 6.20 usec  
 IRNUC 1H  
 CTEMP 25.4 c  
 SLVNT CDCL3  
 EXREF 0.00 ppm  
 BF 0.12 Hz  
 RGAIN 15

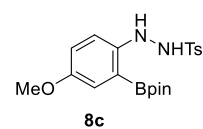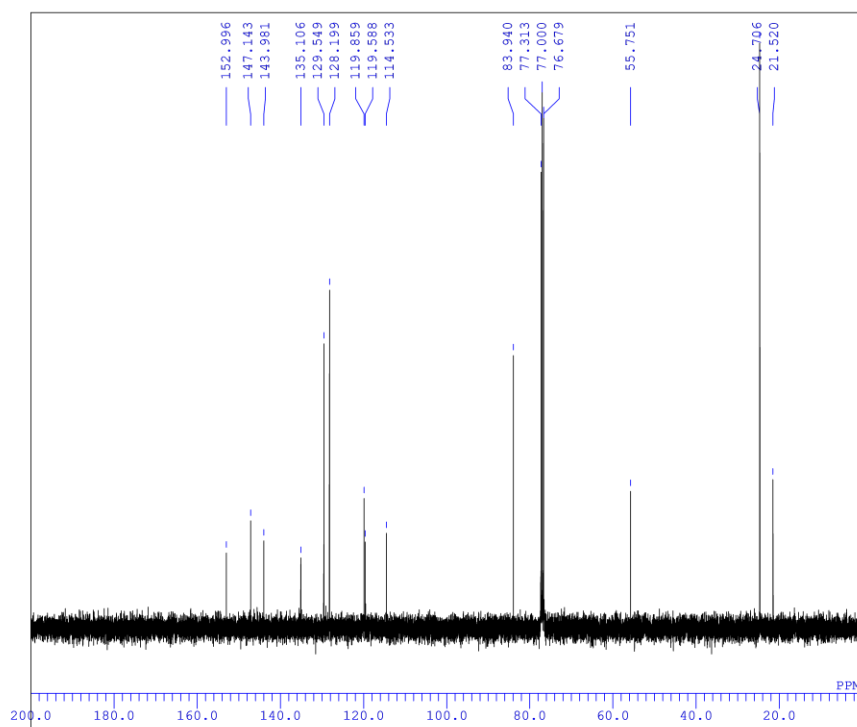

DFILE 4-MeO-2-pinBC6H3NHN  
 COMNT 4-MeO-2-pinBC6H3NHN  
 DATIM Sat Jul 20 14:49:29  
 OBNUC 13C  
 EXMOD BCM  
 OBFREQ 100.40 MHz  
 OBSET 125.00 KHz  
 OBFIN 10500.00 Hz  
 POINT 32768  
 FREQU 27118.64 Hz  
 SCANS 256  
 ACQTM 1.2083 sec  
 PD 1.7920 sec  
 PW1 6.20 usec  
 IRNUC 1H  
 CTEMP 25.4 c  
 SLVNT CDCL3  
 EXREF 77.00 ppm  
 BF 0.12 Hz  
 RGAIN 25

**5-Methoxy-1-(4-Methoxycarbonylphenyl)-1,2,3-benzotriazol and 6-Methoxy-1-(4-Methoxycarbonylphenyl)-1,2,3-benzotriazol (9)**

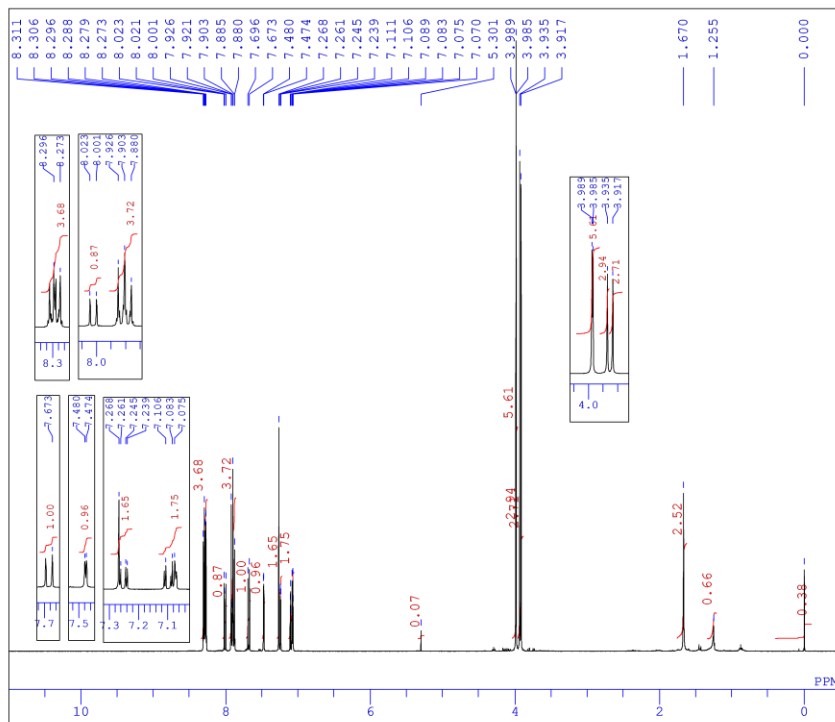

DFILE MeO-1-(4-MeO2CC6H4)  
 COMNT single\_pulse  
 DATIM 2019-07-17 11:14:16  
 OBNUC 1H  
 EXMOD single\_pulse.jxp  
 OBFRQ 399.78 MHz  
 OBSET 4.19 KHz  
 OBFIN 7.29 Hz  
 POINT 26214  
 FREQU 6002.40 Hz  
 SCANS 16  
 ACQTM 4.3673 sec  
 PD 5.0000 sec  
 PW1 3.35 usec  
 IRNUC 1H  
 CTEMP 22.7 c  
 SLVNT CDCL3  
 EXREF 0.00 ppm  
 BF 0.01 Hz  
 RGAIN 42

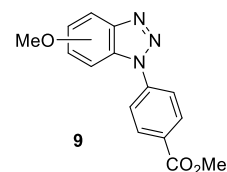

Supplement: c9qo01115c1.pdf [file c9qo01115c1.pdf]
